# Supplementary material for: The Relationship of Aversive and Appetitive Appearance-Related Comparisons with Depression, Well-Being, and Self-esteem: A Response Surface Analysis
Source: Springer Nature journal article supplement (doi:10.1007/s10608-023-10369-6), 2023-06-02
Supplement: MOESM1 [file 25445030]

**Supplemental Material**

**for**

**A Response Surface Analysis of the Relationship of Aversive and Appetitive Appearance-Related Comparisons with Depression, Well-Being, and Self-Esteem**

Part A: Supplemental Material for the main analyses

Table s1.

*Descriptive statistics for predictor pairs*

| Predictors | Outliers | *n* | Av. > App. | Av. = App. | Av. < App. |
| --- | --- | --- | --- | --- | --- |
| *Aversive and appetitive comparison frequency* | 6 | 1106 | 50% | 36% | 14% |
| *Aversive und appetitive comparison discrepancy* | 7 | 1105 | 57% | 33% | 9% |
| *Aversive und appetitive comparison affective impact* | 45 | 1067 | 48% | 36% | 16% |

*Note.* Av. = aversive; app = appetitive. Data pairs are unequal when their scores differ at least by 0.5 z-scores.

Table s2

*Model selection*

| Model | k | AICc | ΔAICc | Akaike weight | Evidence ratio | CFI | *R*2 | *p*Modell | *R*2adj |
| --- | --- | --- | --- | --- | --- | --- | --- | --- | --- |
|  |  |  |  |  | **Depression** |  |  |  |  |
| Frequency |  |  |  |  |  |  |  |  |  |
| SRR | 5 | 6748.85 | 0.00 | .31 | - | 1.00 | 0.2479 | < .001 | 0.2459 |
| SRRR | 6 | 6748.94 | 0.09 | .30 | 1.05 | 1.00 | 0.2492 | < .001 | 0.2465 |
| SRSQD | 5 | 6749.25 | 0.40 | .26 | 1.22 | 1.00 | 0.2477 | < .001 | 0.2456 |
| **full** | **7** | **6750.72** | **1.87** | **.12** | **2.54** | **1.00** | **0.2494** | **< .001** | **0.2460** |
| IA | 5 | 6756.80 | 7.95 | .01 | 53.16 | 0.97 | 0.2425 | < .001 | 0.2404 |
| additive | 4 | 6756.88 | 8.02 | .01 | 55.25 | 0.97 | 0.2411 | < .001 | 0.2397 |
| onlyx2 | 4 | 6760.36 | 11.51 | .00 | 315.53 | 0.96 | 0.2387 | < .001 | 0.2373 |
| onlyx | 3 | 6769.69 | 20.84 | .00 | 33529.48 | 0.93 | 0.2308 | < .001 | 0.2301 |
| RR | 4 | 6794.92 | 46.06 | .00 | 1.00530E+10 | 0.85 | 0.2145 | < .001 | 0.2131 |
| SSQD | 4 | 6836.15 | 87.30 | .00 | 9.03929E+18 | 0.72 | 0.1847 | < .001 | 0.1832 |
| SQD | 3 | 6894.41 | 145.55 | .00 | 4.04399E+31 | 0.53 | 0.1390 | < .001 | 0.1382 |
| null | 2 | 7057.94 | 309.09 | .00 | 1.31203E+67 | 0.00 | 0.0000 | - | 0.0000 |
| onlyy | 3 | 7058.49 | 309.63 | .00 | 1.72328E+67 | 0.00 | 0.0013 | .227 | 0.0004 |
| onlyy2 | 4 | 7058.96 | 310.11 | .00 | 2.18623E+67 | 0.00 | 0.0027 | .224 | 0.0009 |
| Discrepancy |  |  |  |  |  |  |  |  |  |
| IA | 5 | 6889.65 | 0.00 | .43 | - | 0.99 | 0.1402 | < .001 | 0.1378 |
| **full** | **7** | **6890.61** | **0.96** | **.27** | **1.62** | **1.00** | **0.1426** | **< .001** | **0.1387** |
| SRRR | 6 | 6892.40 | 2.75 | .11 | 3.96 | 0.98 | 0.1396 | < .001 | 0.1365 |
| SRR | 5 | 6892.45 | 2.80 | .11 | 4.06 | 0.98 | 0.1380 | < .001 | 0.1356 |
| SRSQD | 5 | 6894.26 | 4.62 | .04 | 10.06 | 0.97 | 0.1366 | < .001 | 0.1342 |
| additive | 4 | 6894.31 | 4.67 | .04 | 10.31 | 0.96 | 0.1349 | < .001 | 0.1334 |
| onlyx | 3 | 6908.93 | 19.28 | .00 | 15393.55 | 0.86 | 0.1218 | < .001 | 0.1210 |
| onlyx2 | 4 | 6910.25 | 20.60 | .00 | 29753.72 | 0.86 | 0.1224 | < .001 | 0.1208 |
| RR | 4 | 6917.47 | 27.83 | .00 | 1103260.40 | 0.82 | 0.1166 | < .001 | 0.1150 |
| SSQD | 4 | 6932.90 | 43.26 | .00 | 2.473732E+9 | 0.72 | 0.1042 | < .001 | 0.1026 |
| SQD | 3 | 6966.51 | 76.86 | .00 | 4.90288E+16 | 0.52 | 0.0749 | < .001 | 0.0740 |
| null | 2 | 7050.47 | 160.82 | .00 | 8.36104E+34 | 0.00 | 0.0000 | - | 0.0000 |
| onlyy | 3 | 7052.37 | 162.72 | .00 | 2.15980E+35 | 0.00 | 0.0001 | .737 | -0.0008 |
| onlyy2 | 4 | 7054.38 | 164.73 | .00 | 5.90394E+35 | 0.00 | 0.0001 | .944 | -0.0017 |
| Affective impact |  |  |  |  |  |  |  |  |  |
| onlyx2 | 4 | 6440.97 | 0.00 | .35 | - | 1.00 | 0.2770 | < .001 | 0.2757 |
| SRRR | 6 | 6441.44 | 0.47 | .28 | 1.26 | 1.00 | 0.2795 | < .001 | 0.2767 |
| SRSQD | 5 | 6442.37 | 1.40 | .17 | 2.01 | 1.00 | 0.2775 | < .001 | 0.2754 |
| **full** | **7** | **6443.46** | **2.49** | **.10** | **3.48** | **1.00** | **0.2795** | **< .001** | **0.2760** |
| onlyx | 3 | 6444.88 | 3.91 | .05 | 7.06 | 0.98 | 0.2730 | < .001 | 0.2723 |
| additive | 4 | 6446.47 | 5.50 | .02 | 15.64 | 0.98 | 0.2733 | < .001 | 0.2719 |
| IA | 5 | 6447.04 | 6.07 | .02 | 20.82 | 0.98 | 0.2743 | < .001 | 0.2722 |
| SRR | 5 | 6447.30 | 6.33 | .01 | 23.73 | 0.98 | 0.2741 | < .001 | 0.2720 |
| SSQD | 4 | 6494.86 | 53.88 | .00 | 5.02056E+11 | 0.84 | 0.2394 | < .001 | 0.2380 |
| RR | 4 | 6506.83 | 65.85 | .00 | 1.99549E+14 | 0.81 | 0.2308 | < .001 | 0.2294 |
| SQD | 3 | 6572.72 | 131.75 | .00 | 4.05977E+28 | 0.61 | 0.1801 | < .001 | 0.1793 |
| onlyy | 3 | 6771.85 | 330.88 | .00 | 7.06720E+71 | 0.03 | 0.0112 | < .001 | 0.0102 |
| onlyy2 | 4 | 6773.59 | 332.62 | .00 | 1.68575E+72 | 0.03 | 0.0114 | .002 | 0.0095 |
| null | 2 | 6781.76 | 340.79 | .00 | 1.00491E+74 | 0.00 | 0.0000 | - | 0.0000 |
|  | Psychological Well-being | | | | | | | | |
| Frequency |  | | | | | | | | |
| **full** | **7** | **9093.75** | **0.00** | **.45** | - | **1.00** | **0.1939** | **< .001** | **0.1903** |
| SRRR | 6 | 9095.82 | 2.07 | .16 | 2.81 | 0.99 | 0.1909 | < .001 | 0.1880 |
| additive | 4 | 9095.93 | 2.18 | .15 | 2.98 | 0.98 | 0.1879 | < .001 | 0.1864 |
| IA | 5 | 9096.87 | 3.13 | .09 | 4.78 | 0.98 | 0.1887 | < .001 | 0.1865 |
| SRSQD | 5 | 9096.93 | 3.18 | .09 | 4.91 | 0.98 | 0.1886 | < .001 | 0.1864 |
| SRR | 5 | 9097.93 | 4.19 | .06 | 8.11 | 0.97 | 0.1879 | < .001 | 0.1857 |
| SSQD | 4 | 9124.17 | 30.42 | .00 | 4027440.74 | 0.86 | 0.1669 | < .001 | 0.1654 |
| onlyx | 3 | 9136.00 | 42.25 | .00 | 1.496443E+9 | 0.80 | 0.1564 | < .001 | 0.1556 |
| onlyx2 | 4 | 9137.94 | 44.20 | .00 | 3.953714E+9 | 0.80 | 0.1565 | < .001 | 0.1549 |
| RR | 4 | 9179.86 | 86.11 | .00 | 4.99494E+18 | 0.62 | 0.1239 | < .001 | 0.1223 |
| SQD | 3 | 9216.17 | 122.42 | .00 | 3.83363E+26 | 0.46 | 0.0930 | < .001 | 0.0922 |
| onlyy | 3 | 9320.05 | 226.30 | .00 | 1.38380E+49 | 0.01 | 0.0037 | .044 | 0.0028 |
| onlyy2 | 4 | 9322.06 | 228.32 | .00 | 3.78679E+49 | 0.01 | 0.0037 | .132 | 0.0019 |
| null | 2 | 9322.09 | 228.35 | .00 | 3.84314E+49 | 0.00 | 0.0000 | - | 0.0000 |
| Discrepancy |  |  |  |  |  |  |  |  |  |
| **full** | **7** | **9143.45** | **0.00** | **.93** | - | **1.00** | **0.1481** | **< .001** | **0.1443** |
| SRSQD | 5 | 9149.78 | 6.32 | .04 | 23.59 | 0.95 | 0.1401 | < .001 | 0.1378 |
| SRRR | 6 | 9151.45 | 8.00 | .02 | 54.55 | 0.95 | 0.1404 | < .001 | 0.1373 |
| IA | 5 | 9153.95 | 10.50 | .00 | 190.38 | 0.93 | 0.1369 | < .001 | 0.1345 |
| additive | 4 | 9155.11 | 11.66 | .00 | 339.99 | 0.91 | 0.1344 | < .001 | 0.1328 |
| SRR | 5 | 9156.40 | 12.95 | .00 | 648.64 | 0.91 | 0.1349 | < .001 | 0.1326 |
| SSQD | 4 | 9175.03 | 31.57 | .00 | 7182203.66 | 0.80 | 0.1186 | < .001 | 0.1170 |
| onlyx2 | 4 | 9188.40 | 44.95 | .00 | 5.761164E+9 | 0.72 | 0.1079 | < .001 | 0.1063 |
| onlyx | 3 | 9189.58 | 46.12 | .00 | 1.03654E+10 | 0.71 | 0.1053 | < .001 | 0.1045 |
| RR | 4 | 9200.75 | 57.29 | .00 | 2.76275E+12 | 0.65 | 0.0979 | < .001 | 0.0962 |
| SQD | 3 | 9227.36 | 83.90 | .00 | 1.65853E+18 | 0.49 | 0.0742 | < .001 | 0.0734 |
| onlyy | 3 | 9309.68 | 166.23 | .00 | 1.24851E+36 | 0.01 | 0.0026 | .091 | 0.0017 |
| onlyy2 | 4 | 9310.17 | 166.72 | .00 | 1.59484E+36 | 0.01 | 0.0040 | .113 | 0.0021 |
| null | 2 | 9310.53 | 167.08 | .00 | 1.90541E+36 | 0.00 | 0.0000 | - | 0.0000 |
| Affective impact |  |  |  |  |  |  |  |  |  |
| **full** | **7** | **8741.13** | **0.00** | **.69** | - | **1.00** | **0.1821** | **< .001** | **0.1782** |
| SRRR | 6 | 8742.77 | 1.64 | .31 | 2.27 | 0.99 | 0.1793 | < .001 | 0.1762 |
| IA | 5 | 8758.93 | 17.80 | .00 | 7344.83 | 0.90 | 0.1651 | < .001 | 0.1628 |
| SSQD | 4 | 8759.30 | 18.17 | .00 | 8832.02 | 0.90 | 0.1632 | < .001 | 0.1617 |
| SRSQD | 5 | 8760.29 | 19.16 | .00 | 14462.00 | 0.90 | 0.1641 | < .001 | 0.1617 |
| additive | 4 | 8761.18 | 20.05 | .00 | 22541.30 | 0.89 | 0.1618 | < .001 | 0.1602 |
| SRR | 5 | 8761.31 | 20.18 | .00 | 24116.10 | 0.89 | 0.1632 | < .001 | 0.1609 |
| onlyx2 | 4 | 8785.13 | 44.00 | .00 | 3.579294E+9 | 0.77 | 0.1427 | < .001 | 0.1410 |
| onlyx | 3 | 8796.09 | 54.96 | .00 | 8.58846E+11 | 0.72 | 0.1321 | < .001 | 0.1313 |
| RR | 4 | 8844.80 | 103.68 | .00 | 3.25703E+22 | 0.49 | 0.0932 | < .001 | 0.0914 |
| SQD | 3 | 8845.61 | 104.48 | .00 | 4.85943E+22 | 0.48 | 0.0908 | < .001 | 0.0899 |
| onlyy2 | 4 | 8886.79 | 145.66 | .00 | 4.27009E+31 | 0.29 | 0.0566 | < .001 | 0.0548 |
| onlyy | 3 | 8888.22 | 147.09 | .00 | 8.70973E+31 | 0.28 | 0.0536 | < .001 | 0.0527 |
| null | 2 | 8944.72 | 203.59 | .00 | 1.62071E+44 | 0.00 | 0.0000 | - | 0.0000 |
|  | Self-esteem | | | | | | | | |
| Frequency |  |  |  |  |  |  |  |  |  |
| **full** | **7** | **6867.89** | **0** | **.49** | - | **1.00** | **0.3076** | **< .001** | **0.3044** |
| SRRR | 6 | 6869.37 | 1.48 | .23 | 2.10 | 0.99 | 0.3054 | < .001 | 0.3029 |
| IA | 5 | 6870.99 | 3.10 | .10 | 4.72 | 0.99 | 0.3031 | < .001 | 0.3012 |
| SRSQD | 5 | 6872.12 | 4.23 | .06 | 8.30 | 0.98 | 0.3024 | < .001 | 0.3005 |
| additive | 4 | 6872.14 | 4.25 | .06 | 8.38 | 0.98 | 0.3011 | < .001 | 0.2998 |
| SRR | 5 | 6872.20 | 4.31 | .06 | 8.62 | 0.98 | 0.3023 | < .001 | 0.3004 |
| SSQD | 4 | 6901.02 | 33.13 | .00 | 15621933.49 | 0.91 | 0.2826 | < .001 | 0.2813 |
| onlyx | 3 | 6974.27 | 106.38 | .00 | 1.26021E+23 | 0.72 | 0.2321 | < .001 | 0.2314 |
| onlyx2 | 4 | 6974.75 | 106.86 | .00 | 1.60249E+23 | 0.73 | 0.2332 | < .001 | 0.2318 |
| RR | 4 | 7016.89 | 149.00 | .00 | 2.26348E+32 | 0.62 | 0.2034 | < .001 | 0.2019 |
| SQD | 3 | 7058.24 | 190.35 | .00 | 2.16114E+41 | 0.52 | 0.1715 | < .001 | 0.1708 |
| onlyy | 3 | 7250.74 | 382.85 | .00 | 1.36569E+83 | 0.04 | 0.0140 | < .001 | 0.0131 |
| onlyy2 | 4 | 7252.75 | 384.86 | .00 | 3.72082E+83 | 0.03 | 0.0140 | < .001 | 0.0122 |
| null | 2 | 7264.33 | 396.44 | .00 | 1.22020E+86 | 0.00 | 0.0000 | - | 0.0000 |
| Discrepancy |  |  |  |  |  |  |  |  |  |
| **Full** | **7** | **6996.22** | **0.00** | **.91** | - | **1.00** | **0.2183** | **< .001** | **0.2147** |
| SRSQD | 5 | 7001.99 | 5.77 | .05 | 17.94 | 0.97 | 0.2113 | < .001 | 0.2091 |
| SRRR | 6 | 7002.79 | 6.57 | .03 | 26.76 | 0.97 | 0.2122 | < .001 | 0.2093 |
| IA | 5 | 7005.98 | 9.77 | .01 | 132.06 | 0.96 | 0.2084 | < .001 | 0.2063 |
| Additive | 4 | 7012.17 | 15.95 | .00 | 2907.76 | 0.93 | 0.2025 | < .001 | 0.2011 |
| SRR | 5 | 7013.10 | 16.89 | .00 | 4642.26 | 0.93 | 0.2033 | < .001 | 0.2011 |
| SSQD | 4 | 7023.14 | 26.92 | .00 | 701624.81 | 0.89 | 0.1946 | < .001 | 0.1931 |
| RR | 4 | 7099.00 | 102.79 | .00 | 2.09000E+22 | 0.60 | 0.1373 | < .001 | 0.1358 |
| onlyx2 | 4 | 7101.73 | 105.51 | .00 | 8.15857E+22 | 0.59 | 0.1352 | < .001 | 0.1336 |
| onlyx | 3 | 7103.56 | 107.34 | .00 | 2.03750E+23 | 0.58 | 0.1322 | < .001 | 0.1314 |
| SQD | 3 | 7117.69 | 121.47 | .00 | 2.38403E+26 | 0.53 | 0.1210 | < .001 | 0.1202 |
| onlyy | 3 | 7242.32 | 246.10 | .00 | 2.75326E+53 | 0.06 | 0.0161 | < .001 | 0.0152 |
| onlyy2 | 4 | 7244.21 | 247.99 | .00 | 7.10022E+53 | 0.06 | 0.0162 | < .001 | 0.0144 |
| null | 2 | 7258.22 | 262.00 | .00 | 7.81597E+56 | 0.00 | 0.0000 | - | 0.0000 |
|  |  |  |  |  |  |  |  |  |  |
| Affect |  |  |  |  |  |  |  |  |  |
| **full** | **7** | **6575.58** | **0.00** | **.69** | - | **1.00** | **0.3112** | **< .001** | **0.3079** |
| SRRR | 6 | 6577.18 | 1.59 | .31 | 2.22 | 0.99 | 0.3088 | < .001 | 0.3062 |
| SRSQD | 5 | 6586.21 | 10.62 | .00 | 202.72 | 0.97 | 0.3016 | < .001 | 0.2996 |
| SRR | 5 | 6590.98 | 15.40 | .00 | 2209.29 | 0.96 | 0.2985 | < .001 | 0.2965 |
| additive | 4 | 6592.00 | 16.42 | .00 | 3676.98 | 0.95 | 0.2965 | < .001 | 0.2951 |
| IA | 5 | 6592.33 | 16.75 | .00 | 4334.60 | 0.95 | 0.2976 | < .001 | 0.2956 |
| SSQD | 4 | 6598.26 | 22.68 | .00 | 84140.43 | 0.93 | 0.2923 | < .001 | 0.2910 |
| onlyx2 | 4 | 6614.30 | 38.71 | .00 | 2.550187E+8 | 0.89 | 0.2816 | < .001 | 0.2802 |
| onlyx | 3 | 6624.96 | 49.38 | .00 | 5.27185E+10 | 0.86 | 0.2729 | < .001 | 0.2722 |
| RR | 4 | 6725.75 | 150.17 | .00 | 4.06560E+32 | 0.61 | 0.2021 | < .001 | 0.2006 |
| SQD | 3 | 6747.35 | 171.76 | .00 | 1.98466E+37 | 0.55 | 0.1842 | < .001 | 0.1834 |
| onlyy2 | 4 | 6898.22 | 322.63 | .00 | 1.14628E+70 | 0.17 | 0.0616 | < .001 | 0.0598 |
| onlyy | 3 | 6900.72 | 325.14 | .00 | 4.01151E+70 | 0.16 | 0.0576 | < .001 | 0.0567 |
| null | 2 | 6961.77 | 386.18 | .00 | 7.22355E+83 | 0.00 | 0.0000 | - | 0.0000 |

*Note*. k = Number of Parameter; AICc = Akaike-Information Criterion; AICc = Difference of the AICc of the respective model compared to the AICc of the best fitting model. Akaike weigth = Probability that the model is the best model; Evidence ratio = Ratio of the Akaike weight in comparison to the best fitting model. Indicates how much more likely the best fitting model is (with compared to this model); CFI = Comparative fit index; SRMR = R²adj = explained variance adjusted for the number of parameters.

*Model names. Models are sorted with decreasing complexity (*Schönbrodt, n.d.)*.* Full = Full Polynomial Model; SRRR = Shifted and Rotated Rising Ridge Model; SRSQD = Shifted and Rotated Squared Difference Model; SRR = Shifted Rising Ridge Model; SSQD = Shifted Squared Difference Model; RR = Rising Ridge Model; SQD = Basic Squared Difference Model; Additive = Additives Modell; IA = Interaction-Only-Model; Onlyx2 / Onlyy2 = model with squared predictors; Onlyx / Onlyy = Model with only one predictor; null = null model.

Table s3

*Test for independence of residuals, normal distribution, homoscedasticity, and multicollinearity of the full model.*

|  | Independence of residuals | |  | Normal distribution | |  | Homoscedasticity | | | | | |  | | Multi-collinearity | |
| --- | --- | --- | --- | --- | --- | --- | --- | --- | --- | --- | --- | --- | --- | --- | --- | --- |
|  | *DW* | *p* |  | *W* | *p* |  | *BP* | | *df* | | *p* | |  | | VIFmax | |
|  | Depression | | | | | | | | | | | | | | | |
| Frequency | 2.04 | .514 |  | 0.977 | < .001 |  | | 7.23 | | 5 | | .204 | |  | | 2.26 |
| Discrepancy | 2.03 | .626 |  | 0.974 | < .001 |  | | 17.97 | | 5 | | .003 | |  | | 2.36 |
| Affective impact | 1.95 | .447 |  | 0.982 | < .001 |  | | 25.17 | | 5 | | < .001 | |  | | 3.59 |
|  | Psychological Well-being | | | | | | | | | | | | | | | |
| Frequency | 1.97 | .616 |  | 0.998 | .155 |  | | 5.09 | | 5 | | .405 | |  | | 2.26 |
| Discrepancy | 1.96 | .493 |  | 0.996 | .014 |  | | 8.03 | | 5 | | .154 | |  | | 2.36 |
| Affective impact | 1.99 | .863 |  | 0.999 | .828 |  | | 22.19 | | 5 | | < .001 | |  | | 3.59 |
|  | Self-Esteem | | | | | | | | | | | | | | | |
| Frequency | 1.93 | .251 |  | 0.997 | .075 |  | | 13.45 | | 5 | | .019 | |  | | 2.26 |
| Discrepancy | 1.94 | .349 |  | 0.997 | .045 |  | | 25.49 | | 5 | | < .001 | |  | | 2.36 |
| Affective impact | 2.02 | .781 |  | 0.997 | .063 |  | | 11.03 | | 5 | | .051 | |  | | 3.59 |

*Note.* *DW* = Durbin-Watson-Test to test Independence of residuals, *W* = Shapiro-Wilk-Test to test normality. *BP* = Breusch-Pagan-Test to test homoscedasticity. VIF = Variance-Inflation-Factor; *p* < .05 for the first three tests and VIF > 5 indicate a violation of the tested properties and are **bolded.**

Table s4

*Regression- and Response Surface Parameter of the full polynomial models*

| Parameter | Estimate | *SE* | 95%-CI lower bound | | | 95%-CI upper bound | | | | | *p* | | |
| --- | --- | --- | --- | --- | --- | --- | --- | --- | --- | --- | --- | --- | --- |
|  | Depression | | | | | | | | | | | |
| Frequency |  |  |  |  | |  | | | |  | | |
| *b0* | 15.27 | 0.23 | 14.82 | |  | 15.73 | | |  | | < .001 | | |
| *b1* | 2.43 | 0.22 | 2.00 | |  | 2.86 | | |  | | < .001 | | |
| *b2* | -0.42 | 0.24 | -0.91 | |  | 0.07 | | |  | | .092 | | |
| *b3* | 0.44 | 0.14 | 0.15 | |  | 0.72 | | |  | | .003 | | |
| *b4* | -0.50 | 0.22 | -0.92 | |  | -0.08 | | |  | | .021 | | |
| *b5* | 0.04 | 0.23 | -0.40 | |  | 0.48 | | |  | | .874 | | |
| *a1* | 2.01 | 0.24 | 1.54 | |  | 2.47 | | |  | | < .001 | | |
| *a2* | -0.03 | 0.25 | -0.54 | |  | 0.47 | | |  | | .901 | | |
| *a3* | 2.85 | 0.40 | 2.05 | |  | 3.63 | | |  | | < .001 | | |
| *a4* | 0.97 | 0.40 | 0.19 | |  | 1.76 | | |  | | .016 | | |
| *a5* | 0.40 | 0.28 | -0.15 | |  | 0.96 | | |  | | .160 | | |
| Discrepancy |  |  |  | |  |  | | |  | |  | | |
| *b0* | 15.46 | 0.24 | 15.00 | |  | 15.92 | | |  | | < .001 | | |
| *b1* | 2.36 | 0.25 | 1.84 | |  | 2.87 | | |  | | < .001 | | |
| *b2* | -0.43 | 0.34 | -1.11 | |  | 0.25 | | |  | | .218 | | |
| *b3* | -0.10 | 0.19 | -0.48 | |  | 0.29 | | |  | | .612 | | |
| *b4* | -0.78 | 0.28 | -1.34 | |  | -0.24 | | |  | | .006 | | |
| *b5* | 0.52 | 0.32 | -0.12 | |  | 1.15 | | |  | | .105 | | |
| *a1* | 1.94 | 0.31 | 1.31 | |  | 2.56 | | |  | | < .001 | | |
| *a2* | -0.36 | 0.30 | -0.95 | |  | 0.24 | | |  | | .238 | | |
| *a3* | 2.79 | 0.52 | 1.77 | |  | 3.84 | | |  | | < .001 | | |
| *a4* | 1.19 | 0.53 | 0.14 | |  | 2.28 | | |  | | .026 | | |
| *a5* | -0.62 | 0.41 | -1.41 | |  | 0.18 | | |  | | .133 | | |
| Affective Impact |  |  |  | |  |  | | |  | |  | | |
| *b0* | 15.93 | 0.26 | 15.42 | |  | 16.43 | | |  | | < .001 | | |
| *b1* | 5.12 | 0.44 | 4.25 | |  | 5.97 | | |  | | < .001 | | |
| *b2* | -0.37 | 0.52 | -1.38 | |  | 0.67 | | |  | | .476 | | |
| *b3* | -0.92 | 0.37 | -1.67 | |  | -0.23 | | |  | | .008 | | |
| *b4* | -1.44 | 0.99 | -3.57 | |  | 0.30 | | |  | | .108 | | |
| *b5* | -0.56 | 1.39 | -3.30 | |  | 2.18 | | |  | | .659 | | |
| *a1* | 4.76 | 0.68 | 3.34 | |  | 6.09 | | |  | | < .001 | | |
| *a2* | -2.91 | 1.92 | -7.03 | |  | 0.58 | | |  | | .106 | | |
| *a3* | 5.49 | 0.67 | 4.14 | |  | 6.78 | | |  | | < .001 | | |
| *a4* | -0.04 | 1.55 | -3.03 | |  | 3.06 | | |  | | .998 | | |
| *a5* | -0.36 | 1.43 | -3.23 | |  | 2.49 | | |  | | .827 | | |
|  | Psychological Well-Being | | | | | | | | | | | | |
| *Frequency* |  |  |  | | |  | |  | | | |  | |
| *b0* | 88.94 | 0.65 | 87.66 | |  | 90.22 | | |  | | < .001 | | |
| *b1* | -7.66 | 0.65 | -8.97 | |  | -6.42 | | |  | | < .001 | | |
| *b2* | 3.52 | 0.67 | 2.24 | |  | 4.85 | | |  | | < .001 | | |
| *b3* | 0.83 | 0.41 | 0.05 | |  | 1.67 | | |  | | .037 | | |
| *b4* | 0.52 | 0.57 | -0.65 | |  | 1.61 | | |  | | .385 | | |
| *b5* | -1.34 | 0.63 | -2.58 | |  | -0.08 | | |  | | .038 | | |
| *a1* | -4.14 | 0.67 | -5.46 | |  | -2.80 | | |  | | < .001 | | |
| *a2* | 0.01 | 0.70 | -1.34 | |  | 1.41 | | |  | | .992 | | |
| *a3* | -11.19 | 1.14 | -13.49 | |  | -9.01 | | |  | | < .001 | | |
| *a4* | -1.03 | 1.04 | -3.01 | |  | 1.09 | | |  | | .346 | | |
| *a5* | 2.17 | 0.82 | 0.53 | |  | 3.81 | | |  | | .009 | | |
| Discrepancy |  |  |  | |  |  | | |  | |  | | |
| *b0* | 89.34 | 0.68 | 88.01 | |  | 90.66 | | |  | | < .001 | | |
| *b1* | -7.52 | 0.78 | -9.11 | |  | -5.99 | | |  | | < .001 | | |
| *b2* | 2.48 | 0.93 | 0.68 | |  | 4.32 | | |  | | .008 | | |
| *b3* | 1.47 | 0.57 | 0.37 | |  | 2.61 | | |  | | .010 | | |
| *b4* | 1.32 | 0.80 | -0.34 | |  | 2.83 | | |  | | .119 | | |
| *b5* | -2.62 | 0.84 | -4.29 | |  | -0.95 | | |  | | .002 | | |
| *a1* | -5.03 | 0.81 | -6.65 | |  | -3.46 | | |  | | < .001 | | |
| *a2* | 0.16 | 0.84 | -1.52 | |  | 1.77 | | |  | | .840 | | |
| *a3* | -10.00 | 1.51 | -13.04 | |  | -7.08 | | |  | | < .001 | | |
| *a4* | -2.48 | 1.50 | -5.36 | |  | 0.64 | | |  | | .119 | | |
| *a5* | 4.09 | 1.11 | 1.91 | |  | 6.28 | | |  | | .001 | | |
| Affective impact |  |  |  | |  |  | | |  | |  | | |
| *b0* | 88.55 | 0.76 | 87.06 | |  | 90.04 | | |  | | < .001 | | |
| *b1* | -10.67 | 1.36 | -13.32 | |  | -7.91 | | |  | | < .001 | | |
| *b2* | 8.11 | 1.56 | 5.08 | |  | 11.21 | | |  | | < .001 | | |
| *b3* | 4.56 | 1.12 | 2.43 | |  | 6.86 | | |  | | < .001 | | |
| *b4* | 6.48 | 2.90 | 1.10 | |  | 12.72 | | |  | | .016 | | |
| *b5* | -5.89 | 4.21 | -13.96 | |  | 2.66 | | |  | | .173 | | |
| *a1* | -2.56 | 2.21 | -6.85 | |  | 1.94 | | |  | | .272 | | |
| *a2* | 5.15 | 5.79 | -5.75 | |  | 17.44 | | |  | | .350 | | |
| *a3* | -18.77 | 1.92 | -22.68 | |  | -15.02 | | |  | | < .001 | | |
| *a4* | -7.80 | 4.60 | -16.74 | |  | 1.40 | | |  | | .093 | | |
| *a5* | 10.45 | 4.35 | 1.73 | |  | 18.94 | | |  | | .018 | | |
|  | Self-esteem | | | | | | | | | | | | |
| *Frequency* |  |  |  | | | |  | | | |  | | |
| *b0* | 29.20 | 0.24 | 28.73 | |  | 29.67 | | |  | | < .001 | | |
| *b1* | -3.52 | 0.23 | -3.96 | |  | -3.07 | | |  | | < .001 | | |
| *b2* | 1.95 | 1.95 | 1.45 | |  | 2.44 | | |  | | < .001 | | |
| *b3* | 0.18 | 0.18 | -0.13 | |  | 0.48 | | |  | | .238 | | |
| *b4* | 0.44 | 0.44 | 0.04 | |  | 0.85 | | |  | | .032 | | |
| *b5* | -0.62 | -0.62 | -1.09 | |  | -0.15 | | |  | | .010 | | |
| *a1* | -1.57 | 0.25 | -2.06 | |  | -1.09 | | |  | | < .001 | | |
| *a2* | 0.00 | 0.26 | -0.51 | |  | 0.51 | | |  | | .998 | | |
| *a3* | -5.47 | 0.40 | -6.27 | |  | -4.66 | | |  | | < .001 | | |
| *a4* | -0.87 | 0.38 | -1.63 | |  | -0.13 | | |  | | .022 | | |
| *a5* | 0.80 | 0.31 | 0.19 | |  | 1.41 | | |  | | .011 | | |
| Discrepancy |  |  |  | |  |  | | |  | |  | | |
| *b0* | 29.16 | 0.26 | 28.66 | |  | 29.66 | | |  | | < .001 | | |
| *b1* | -3.44 | 0.28 | -3.99 | |  | -2.88 | | |  | | < .001 | | |
| *b2* | 1.92 | 0.34 | 1.23 | |  | 2.59 | | |  | | < .001 | | |
| *b3* | 0.61 | 0.21 | 0.19 | |  | 1.03 | | |  | | .004 | | |
| *b4* | 0.70 | 0.33 | 0.06 | |  | 1.35 | | |  | | .034 | | |
| *b5* | -0.88 | 0.33 | -1.53 | |  | -0.22 | | |  | | .009 | | |
| *a1* | -1.53 | 0.30 | -2.14 | |  | -0.94 | | |  | | < .001 | | |
| *a2* | 0.44 | 0.33 | -0.22 | |  | 1.06 | | |  | | .197 | | |
| *a3* | -5.36 | 0.54 | -6.44 | |  | -4.28 | | |  | | < .001 | | |
| *a4* | -0.97 | 0.63 | -2.22 | |  | 0.28 | | |  | | .125 | | |
| *a5* | 1.49 | 0.40 | 0.71 | |  | 2.27 | | |  | | < .001 | | |
| Affective impact |  |  |  | |  |  | | |  | |  | | |
| *b0* | 28.81 | 0.27 | 28.28 | |  | 29.35 | | |  | | < .001 | | |
| *b1* | -5.86 | 0.48 | -6.77 | |  | -4.91 | | |  | | < .001 | | |
| *b2* | 2.83 | 0.56 | 1.75 | |  | 3.98 | | |  | | < .001 | | |
| *b3* | 1.58 | 0.39 | 0.84 | |  | 2.38 | | |  | | < .001 | | |
| *b4* | 1.60 | 1.05 | -0.31 | |  | 3.84 | | |  | | .103 | | |
| *b5* | -2.48 | 1.52 | -5.52 | |  | 0.52 | | |  | | .111 | | |
| *a1* | -3.03 | 0.79 | -4.56 | |  | -1.40 | | |  | | < .001 | | |
| *a2* | 0.70 | 2.18 | -3.37 | |  | 5.35 | | |  | | .749 | | |
| *a3* | -8.70 | 0.68 | -10.04 | |  | -7.39 | | |  | | < .001 | | |
| *a4* | -2.51 | 1.55 | -5.67 | |  | 0.53 | | |  | | .102 | | |
| *a5* | 4.06 | 1.57 | 0.99 | |  | 7.19 | | |  | | .009 | | |

*Note.* *SE* = Standard error; CI = confidence interval; *b*0 = Intercept; *b*1 = aversive comparison component; *b*2 = appetitive comparison component; *b*3 = squared aversive comparison component; *b*4 = interaction term aversive and appetitive aversive comparison component; *b*5 = squared appetitive aversive comparison component. CIs and *p*-values are based on a bootstrap procedure with 10.000 iterations expect for the Intercept.

Part B: Supplemental Material for the analyses without outliers

Table s5

*Descriptive statistics for predictor pairs*

| Predictors | *n* | Av. > App. | Av. = App. | Av. < App. |
| --- | --- | --- | --- | --- |
| *Aversive and appetitive Frequency* | 1112 | 49% | 37% | 14% |
| *Aversive and appetitive Discrepancy* | 1112 | 57% | 34% | 9% |
| *Aversive and appetitive affective impact* | 1112 | 45% | 36% | 19% |

*Note.* Av. = aversive; app = appetitive. Data pairs are unequal when their scores differ at least by 0.5 z-scores.

Table s6

*Test for independence of residuals, normal distribution, homoscedasticity, and multicollinearity of the full model.*

|  | Independence of residuals | |  | Normal distribution | |  | Homoscedasticity | | | | | |  | | Multicollinearity | | | | |
| --- | --- | --- | --- | --- | --- | --- | --- | --- | --- | --- | --- | --- | --- | --- | --- | --- | --- | --- | --- |
|  | *DW* | *p* |  | *W* | *p* |  | *BP* | | *df* | | *p* | |  | | VIFmax | |
|  | Depression | | | | | | | | | | | | | | | | | |
| Frequency | 2.04 | .499 |  | 0.978 | < .001 |  | | 7.95 | | 5 | | .159 | |  | | 2.23 | |
| Discrepancy | 2.03 | .577 |  | 0.975 | < .001 |  | | 21.06 | | 5 | | < .001 | |  | | 2.37 | |
| Affective impact | 1.98 | .695 |  | 0.981 | < .001 |  | | 29.42 | | 5 | | < .001 | |  | | 3.20 | |
|  | Psychological Well-Being | | | | | | | | | | | | | | | | | |
| Frequency | 1.96 | .511 |  | 0.998 | .133 |  | | 5.32 | | 5 | | .379 | |  | | 2.23 | |
| Discrepancy | 1.95 | .442 |  | 0.996 | .011 |  | | 8.21 | | 5 | | .145 | |  | | 2.37 | |
| Affective impact | 1.99 | .822 |  | 0.999 | .816 |  | | 20.04 | | 5 | | .001 | |  | | 3.20 | |
|  | Self-Esteem | | | | | | | | | | | | | | | | | |
| Frequency | 1.93 | .268 |  | 0.997 | .070 |  | | 14.15 | | 5 | | .015 | |  | | 2.23 | |
| Discrepancy | 1.94 | .295 |  | 0.997 | .041 |  | | 26.32 | | 5 | | < .001 | |  | | 2.37 | |
| Affective impact | 1.997 | .964 |  | 0.997 | .026 |  | | 11.72 | | 5 | | .039 | |  | | 3.20 | |

*Note.* *DW* = Durbin-Watson-Test to test Independence of residuals, *W* = Shapiro-Wilk-Test to test normality. *BP* = Breusch-Pagan-Test to test homoscedasticity. VIF = Variance-Inflation-Factor; *p* < .05 for the first three tests and VIF > 5 indicate a violation of the tested properties and are **bolded.**

Table s7

*Model selection (including outliers)*

| Model | k | AICc | ΔAICc | Akaike Weight | Evidence ratio | CFI | *R*2 | *p*Modell | *R*2adj |
| --- | --- | --- | --- | --- | --- | --- | --- | --- | --- |
|  |  |  |  |  | **Depression** |  |  |  |  |
| Frequency |  |  |  |  |  |  |  |  |  |
| SRR | 5 | 6790.03 | 0.00 | .31 | - | 1.00 | 0.2488 | < .001 | 0.2468 |
| SRRR | 6 | 6790.20 | 0.17 | .29 | 1.09 | 1.00 | 0.2500 | < .001 | 0.2473 |
| SRSQD | 5 | 6790.26 | 0.23 | .28 | 1.12 | 1.00 | 0.2486 | < .001 | 0.2466 |
| **full** | **7** | **6792.08** | **2.05** | **.11** | **2.79** | **1.00** | **0.2501** | **< .001** | **0.2467** |
| additive | 4 | 6798.48 | 8.45 | .00 | 68.51 | 0.97 | 0.2417 | < .001 | 0.2403 |
| IA | 5 | 6799.80 | 9.77 | .00 | 132.10 | 0.97 | 0.2422 | < .001 | 0.2401 |
| onlyx2 | 4 | 6799.81 | 9.78 | .00 | 132.80 | 0.97 | 0.2408 | < .001 | 0.2394 |
| onlyx | 3 | 6809.55 | 19.52 | .00 | 17365.21 | 0.93 | 0.2327 | < .001 | 0.2320 |
| RR | 4 | 6835.23 | 45.19 | .00 | 6.515472E+9 | 0.85 | 0.2162 | < .001 | 0.2148 |
| SSQD | 4 | 6886.99 | 96.95 | .00 | 1.13101E+21 | 0.69 | 0.1789 | < .001 | 0.1774 |
| SQD | 3 | 6941.56 | 151.53 | .00 | 8.02982E+32 | 0.51 | 0.1360 | < .001 | 0.1352 |
| onlyy | 3 | 7101.32 | 311.29 | .00 | 3.93439E+67 | 0.01 | 0.0025 | .095 | 0.0016 |
| null | 2 | 7102.10 | 312.07 | .00 | 5.81655E+67 | 0.00 | 0.0000 | - | 0.0000 |
| onlyy2 | 4 | 7103.33 | 313.30 | .00 | 1.07724E+68 | 0.00 | 0.0025 | .248 | 0.0007 |
| Discrepancy |  |  |  |  |  |  |  |  |  |
| **full** | **7** | **6939.41** | **0.00** | **.39** | **-** | **1.00** | **0.1439** | **< .001** | **0.1400** |
| SRRR | 6 | 6939.85 | 0.43 | .32 | 1.24 | 0.99 | 0.1420 | < .001 | 0.1389 |
| SRR | 5 | 6941.51 | 2.10 | .14 | 2.86 | 0.98 | 0.1392 | < .001 | 0.1368 |
| IA | 5 | 6942.73 | 3.32 | .07 | 5.25 | 0.97 | 0.1382 | < .001 | 0.1359 |
| additive | 4 | 6943.61 | 4.20 | .05 | 8.17 | 0.96 | 0.1360 | < .001 | 0.1344 |
| SRSQD | 5 | 6944.56 | 5.15 | .03 | 13.11 | 0.96 | 0.1368 | < .001 | 0.1345 |
| onlyx | 3 | 6956.44 | 17.03 | .00 | 4985.84 | 0.87 | 0.1244 | < .001 | 0.1236 |
| onlyx2 | 4 | 6958.00 | 18.58 | .00 | 10841.12 | 0.87 | 0.1247 | < .001 | 0.1231 |
| RR | 4 | 6965.04 | 25.63 | .00 | 367856.16 | 0.83 | 0.1192 | < .001 | 0.1176 |
| SSQD | 4 | 6989.17 | 49.76 | .00 | 6.38896E+10 | 0.69 | 0.0998 | < .001 | 0.0982 |
| SQD | 3 | 7020.47 | 81.06 | .00 | 3.99056E+17 | 0.49 | 0.0725 | < .001 | 0.0716 |
| null | 2 | 7102.10 | 162.68 | .00 | 2.12118E+35 | 0.00 | 0.0000 | - | 0.0000 |
| onlyy | 3 | 7103.32 | 163.91 | .00 | 3.90947E+35 | 0.00 | 0.0007 | 0.375 | -0.0002 |
| onlyy2 | 4 | 7103.78 | 164.37 | .00 | 4.92446E+35 | 0.00 | 0.0021 | 0.311 | 0.0003 |
| Affective impact |  |  |  |  |  |  |  |  |  |
| onlyx2 | 4 | 6750.84 | 0.00 | .33 | - | 0.99 | 0.2735 | < .001 | 0.2722 |
| **full** | **7** | **6751.29** | **0.46** | **.26** | **1.26** | **1.00** | **0.2771** | **< .001** | **0.2739** |
| SRRR | 6 | 6751.89 | 1.06 | .19 | 1.70 | 1.00 | 0.2754 | < .001 | 0.2728 |
| SRSQD | 5 | 6752.80 | 1.96 | .12 | 2.67 | 0.99 | 0.2735 | < .001 | 0.2716 |
| onlyx | 3 | 6754.40 | 3.57 | .05 | 5.95 | 0.98 | 0.2698 | < .001 | 0.2692 |
| IA | 5 | 6756.37 | 5.54 | .02 | 15.93 | 0.98 | 0.2712 | < .001 | 0.2692 |
| additive | 4 | 6756.42 | 5.58 | .02 | 16.28 | 0.98 | 0.2698 | < .001 | 0.2685 |
| SRR | 5 | 6758.38 | 7.55 | .01 | 43.52 | 0.97 | 0.2699 | < .001 | 0.2679 |
| SSQD | 4 | 6816.35 | 65.51 | .00 | 1.68362E+14 | 0.81 | 0.2294 | < .001 | 0.2280 |
| RR | 4 | 6853.11 | 102.27 | .00 | 1.61553E+22 | 0.71 | 0.2035 | < .001 | 0.2021 |
| SQD | 3 | 6917.39 | 166.55 | .00 | 1.46444E+36 | 0.52 | 0.1546 | < .001 | 0.1538 |
| onlyy2 | 4 | 7089.79 | 338.95 | .00 | 4.00681E+73 | 0.04 | 0.0146 | < .001 | 0.0128 |
| onlyy | 3 | 7091.01 | 340.18 | .00 | 7.39048E+73 | 0.03 | 0.0117 | < .001 | 0.0108 |
| null | 2 | 7102.10 | 351.26 | .00 | 1.88569E+76 | 0.00 | 0.0000 | - | 0.0000 |
|  | **Psychological Well-being** | | | | | | | | |
| Häufigkeit |  | | | | | | | | |
| **full** | **7** | **9141.44** | **0.00** | **.39** | **-** | **1.00** | **0.1928** | **< .001** | **0.1891** |
| SRRR | 6 | 9142.42 | 0.99 | .24 | 1.64 | 0.99 | 0.1906 | < .001 | 0.1877 |
| IA | 5 | 9143.63 | 2.20 | .13 | 3.00 | 0.98 | 0.1882 | < .001 | 0.1860 |
| additive | 4 | 9143.72 | 2.29 | .12 | 3.14 | 0.98 | 0.1867 | < .001 | 0.1852 |
| SRSQD | 5 | 9144.80 | 3.37 | .07 | 5.39 | 0.98 | 0.1874 | < .001 | 0.1852 |
| SRR | 5 | 9145.70 | 4.26 | .05 | 8.43 | 0.97 | 0.1867 | < .001 | 0.1845 |
| SSQD | 4 | 9171.62 | 30.19 | .00 | 3590077.053 | 0.86 | 0.1660 | < .001 | 0.1645 |
| onlyx | 3 | 9187.46 | 46.03 | .00 | 9878884548 | 0.79 | 0.1525 | < .001 | 0.1518 |
| onlyx2 | 4 | 9189.06 | 47.62 | .00 | 21921740132 | 0.78 | 0.1528 | < .001 | 0.1513 |
| RR | 4 | 9229.73 | 88.29 | .00 | 1.48573E+19 | 0.61 | 0.1213 | < .001 | 0.1197 |
| SQD | 3 | 9263.44 | 122.01 | .00 | 3.11335E+26 | 0.46 | 0.0926 | < .001 | 0.0918 |
| onlyy | 3 | 9367.07 | 225.64 | .00 | 9.9244E+48 | 0.01 | 0.0040 | .036 | 0.0031 |
| onlyy2 | 4 | 9369.06 | 227.62 | .00 | 2.67867E+49 | 0.01 | 0.0040 | .110 | 0.0022 |
| null | 2 | 9369.47 | 228.03 | .00 | 3.28789E+49 | 0.00 | 0.0000 | - | 0.0000 |
| Discrepancy |  |  |  |  |  |  |  |  |  |
| **full** | **7** | **9201.67** | **0.00** | **.98** | **-** | **1.00** | **0.1478** | **< .001** | **0.1440** |
| SRRR | 6 | 9210.32 | 8.64 | .01 | 75.35 | 0.94 | 0.1396 | < .001 | 0.1365 |
| IA | 5 | 9213.72 | 12.05 | .00 | 413.02 | 0.92 | 0.1354 | < .001 | 0.1331 |
| additive | 4 | 9214.03 | 12.36 | .00 | 481.88 | 0.91 | 0.1336 | < .001 | 0.1320 |
| SRSQD | 5 | 9215.01 | 13.34 | .00 | 787.69 | 0.91 | 0.1344 | < .001 | 0.1321 |
| SRR | 5 | 9215.27 | 13.60 | .00 | 896.26 | 0.91 | 0.1342 | < .001 | 0.1319 |
| SSQD | 4 | 9237.53 | 35.86 | .00 | 61245785.55 | 0.77 | 0.1151 | < .001 | 0.1135 |
| onlyx2 | 4 | 9245.28 | 43.60 | .00 | 2.942180E+9 | 0.73 | 0.1089 | < .001 | 0.1073 |
| onlyx | 3 | 9247.31 | 45.64 | .00 | 8.151092E+9 | 0.71 | 0.1057 | < .001 | 0.1048 |
| RR | 4 | 9258.38 | 56.71 | .00 | 2.06611E+12 | 0.65 | 0.0983 | < .001 | 0.0967 |
| SQD | 3 | 9287.96 | 86.29 | .00 | 5.46136E+18 | 0.48 | 0.0724 | < .001 | 0.0715 |
| onlyy2 | 4 | 9369.04 | 167.37 | .00 | 2.20761E+36 | 0.01 | 0.0040 | .109 | 0.0022 |
| null | 2 | 9369.47 | 167.80 | .00 | 2.73441E+36 | 0.00 | 0.0000 | - | 0.0000 |
| onlyy | 3 | 9369.81 | 168.14 | .00 | 3.23965E+36 | 0.00 | 0.0015 | .197 | 0.0006 |
| Affective Impact |  |  |  |  |  |  |  |  |  |
| **full** | **7** | **9142.38** | **0.00** | **.91** | **-** | **1.00** | **0.1921** | **< .001** | **0.1884** |
| SRRR | 6 | 9147.06 | 4.68 | .09 | 10.38 | 0.98 | 0.1872 | < .001 | 0.1843 |
| SRSQD | 5 | 9153.59 | 11.21 | .00 | 271.25 | 0.94 | 0.1809 | < .001 | 0.1787 |
| IA | 5 | 9157.42 | 15.04 | .00 | 1846.27 | 0.93 | 0.1781 | < .001 | 0.1759 |
| additive | 4 | 9162.38 | 20.00 | .00 | 22023.23 | 0.90 | 0.1729 | < .001 | 0.1714 |
| SSQD | 4 | 9162.50 | 20.11 | .00 | 23316.32 | 0.90 | 0.1728 | < .001 | 0.1713 |
| SRR | 5 | 9164.40 | 22.01 | .00 | 60282.45 | 0.90 | 0.1729 | < .001 | 0.1707 |
| Onlyx2 | 4 | 9196.22 | 53.84 | .00 | 4.90414E+11 | 0.75 | 0.1474 | < .001 | 0.1458 |
| onlyx | 3 | 9203.79 | 61.41 | .00 | 2.16481E+13 | 0.72 | 0.1400 | < .001 | 0.1392 |
| SQD | 3 | 9287.23 | 144.84 | .00 | 2.83219E+31 | 0.36 | 0.0730 | < .001 | 0.0721 |
| RR | 4 | 9287.92 | 145.54 | .00 | 4.01007E+31 | 0.36 | 0.0741 | < .001 | 0.0724 |
| onlyy2 | 4 | 9293.68 | 151.29 | .00 | 7.12336E+32 | 0.34 | 0.0693 | < .001 | 0.0676 |
| onlyy | 3 | 9296.86 | 154.48 | .00 | 3.50888E+33 | 0.32 | 0.0649 | < .001 | 0.0641 |
| null | 2 | 9369.47 | 227.09 | .00 | 2.04721E+49 | 0.00 | 0.0000 | - | 0.0000 |
|  | Self-Esteem | | | | | | | | |
| Frequency |  |  |  |  |  |  |  |  |  |
| **Full** | **7** | **6902.52** | **0.00** | **.61** | **-** | **1.00** | **0.3070** | **< .001** | **0.3039** |
| SRRR | 6 | 6903.93 | 1.41 | .30 | 2.03 | 0.99 | 0.3049 | < .001 | 0.3024 |
| SRR | 5 | 6908.61 | 6.09 | .03 | 21.01 | 0.98 | 0.3007 | < .001 | 0.2988 |
| Additive | 4 | 6909.14 | 6.62 | .02 | 27.43 | 0.98 | 0.2991 | < .001 | 0.2978 |
| IA | 5 | 6909.26 | 6.75 | .02 | 29.15 | 0.98 | 0.3003 | < .001 | 0.2984 |
| SRSQD | 5 | 6909.68 | 7.16 | .02 | 35.92 | 0.98 | 0.3000 | < .001 | 0.2981 |
| SSQD | 4 | 6942.32 | 39.80 | .00 | 4.395331E+8 | 0.89 | 0.2778 | < .001 | 0.2765 |
| Onlyx | 3 | 7009.63 | 107.11 | .00 | 1.81679E+23 | 0.72 | 0.2314 | < .001 | 0.2307 |
| onlyx2 | 4 | 7010.45 | 107.94 | .00 | 2.74412E+23 | 0.72 | 0.2322 | < .001 | 0.2308 |
| RR | 4 | 7051.01 | 148.49 | .00 | 1.75870E+32 | 0.62 | 0.2037 | < .001 | 0.2023 |
| SQD | 3 | 7094.36 | 191.84 | .00 | 4.55354E+41 | 0.51 | 0.1705 | < .001 | 0.1698 |
| Onlyy | 3 | 7289.10 | 386.58 | .00 | 8.79992E+83 | 0.03 | 0.0118 | < .001 | 0.0109 |
| onlyy2 | 4 | 7290.32 | 387.80 | .00 | 1.62175E+84 | 0.03 | 0.0125 | < .001 | 0.0107 |
| Null | 2 | 7300.26 | 397.75 | .00 | 2.34175E+86 | 0.00 | 0.0000 | - | 0.0000 |
| Discrepancy |  |  |  |  |  |  |  |  |  |
| **Full** | **7** | **7036.84** | **0.00** | **.99** | **-** | **1.00** | **0.2181** | **< .001** | **0.2145** |
| SRSQD | 5 | 7047.43 | 10.59 | .00 | 199.06 | 0.95 | 0.2077 | < .001 | 0.2055 |
| SRRR | 6 | 7048.83 | 11.99 | .00 | 400.99 | 0.95 | 0.2081 | < .001 | 0.2053 |
| IA | 5 | 7052.80 | 15.96 | .00 | 2916.59 | 0.93 | 0.2039 | < .001 | 0.2017 |
| Additive | 4 | 7054.50 | 17.67 | .00 | 6853.82 | 0.92 | 0.2012 | < .001 | 0.1997 |
| SRR | 5 | 7055.33 | 18.50 | .00 | 10380.28 | 0.92 | 0.2020 | < .001 | 0.1999 |
| SSQD | 4 | 7069.76 | 32.92 | .00 | 14086946.56 | 0.87 | 0.1902 | < .001 | 0.1887 |
| RR | 4 | 7138.80 | 101.96 | .00 | 1.37984E+22 | 0.61 | 0.1383 | < .001 | 0.1367 |
| onlyx2 | 4 | 7140.42 | 103.58 | .00 | 3.10510E+22 | 0.60 | 0.1370 | < .001 | 0.1355 |
| Onlyx | 3 | 7142.58 | 105.74 | .00 | 9.15610E+22 | 0.59 | 0.1338 | < .001 | 0.1330 |
| SQD | 3 | 7161.48 | 124.64 | .00 | 1.16032E+27 | 0.52 | 0.1189 | < .001 | 0.1181 |
| onlyy2 | 4 | 7287.84 | 251.00 | .00 | 3.19152E+54 | 0.05 | 0.0147 | < .001 | 0.0129 |
| onlyy | 3 | 7288.65 | 251.81 | .00 | 4.79615E+54 | 0.05 | 0.0122 | < .001 | 0.0113 |
| null | 2 | 7300.26 | 263.42 | .00 | 1.59149E+57 | 0.00 | 0.0000 | - | 0.0000 |
|  |  |  |  |  |  |  |  |  |  |
| Affect |  |  |  |  |  |  |  |  |  |
| **full** | **7** | **6877.54** | **0.00** | **.95** | **-** | **1.00** | **0.3224** | **< .001** | **0.3194** |
| SRRR | 6 | 6883.66 | 6.12 | .04 | 21.34 | 0.98 | 0.3174 | < .001 | 0.3150 |
| SRSQD | 5 | 6892.42 | 14.88 | .00 | 1702.22 | 0.96 | 0.3108 | < .001 | 0.3089 |
| IA | 5 | 6895.63 | 18.09 | .00 | 8476.92 | 0.95 | 0.3088 | < .001 | 0.3069 |
| additive | 4 | 6895.81 | 18.27 | .00 | 9262.91 | 0.95 | 0.3074 | < .001 | 0.3062 |
| SRR | 5 | 6897.55 | 20.01 | .00 | 22113.48 | 0.95 | 0.3076 | < .001 | 0.3057 |
| SSQD | 4 | 6911.25 | 33.71 | .00 | 20902729.26 | 0.91 | 0.2977 | < .001 | 0.2965 |
| onlyx2 | 4 | 6921.49 | 43.94 | .00 | 3.487383E+9 | 0.89 | 0.2912 | < .001 | 0.2900 |
| onlyx | 3 | 6930.81 | 53.27 | .00 | 3.69240E+11 | 0.87 | 0.2840 | < .001 | 0.2833 |
| RR | 4 | 7104.67 | 227.13 | .00 | 2.09180E+49 | 0.46 | 0.1643 | < .001 | 0.1628 |
| SQD | 3 | 7124.30 | 246.76 | .00 | 3.82489E+53 | 0.41 | 0.1479 | < .001 | 0.1471 |
| onlyy2 | 4 | 7218.51 | 340.97 | .00 | 1.09609E+74 | 0.20 | 0.0742 | < .001 | 0.0726 |
| onlyy | 3 | 7224.61 | 347.07 | .00 | 2.31799E+75 | 0.18 | 0.0675 | < .001 | 0.0666 |
| null | 2 | 7300.26 | 422.72 | .00 | 6.20522E+91 | 0.00 | 0.0000 | - | 0.0000 |

*Note*. k = Number of Parameter; AICc = Akaike-Information Criterion; AICc = Difference of the AICc of the respective model compared to the AICc of the best fitting model. Akaike weight = Probability that the model is the best model; Evidence ratio = Ratio of the Akaike weight in comparison to the best fitting model. Indicates how much more likely the best fitting model is (with compared to this model); CFI = Comparative fit index; SRMR = R²adj = explained variance adjusted for the number of parameters.

*Model names. Models are sorted with decreasing complexity (*Schönbrodt, n.d.)*.* Full = Full Polynomial Model; SRRR = Shifted and Rotated Rising Ridge Model; SRSQD = Shifted and Rotated Squared Difference Model; SRR = Shifted Rising Ridge Model; SSQD = Shifted Squared Difference Model; RR = Rising Ridge Model; SQD = Basic Squared Difference Model; Additive = Additives Modell; IA = Interaction-Only-Model; Onlyx2 / Onlyy2 = model with squared predictors; Onlyx / Onlyy = Model with only one predictor; null = null model.

Table s8

*Regression- and Response Surface Parameter of the full polynomial models*

| Parameter | Estimate | *SE* | 95%-CI lower bound | | | 95%-CI upper bound | | | *p* |
| --- | --- | --- | --- | --- | --- | --- | --- | --- | --- |
|  | Depression | | | | | | | | |
| Frequency |  | | | | | | | | |
| *b0* | 15.19 | 0.23 | 14.73 | |  | | 15.64 |  | < .001 |
| *b1* | 2.47 | 0.22 | 2.04 | |  | | 2.90 |  | < .001 |
| *b2* | -0.33 | 0.24 | -0.81 | |  | | 0.12 |  | .157 |
| *b3* | 0.44 | 0.15 | 0.15 | |  | | 0.72 |  | .003 |
| *b4* | -0.46 | 0.21 | -0.88 | |  | | -0.05 |  | .030 |
| *b5* | 0.19 | 0.22 | -0.26 | |  | | 0.61 |  | .403 |
| *a1* | 2.14 | 0.23 | 1.66 | |  | | 2.56 |  | < .001 |
| *a2* | 0.17 | 0.24 | -0.38 | |  | | 0.58 |  | .536 |
| *a3* | 2.79 | 0.39 | 2.04 | |  | | 3.58 |  | < .001 |
| *a4* | 1.09 | 0.40 | 0.29 | |  | | 1.86 |  | .008 |
| *a5* | 0.24 | 0.27 | -0.29 | |  | | 0.80 |  | .346 |
| Discrepancy |  |  |  | |  | |  |  |  |
| *b0* | 15.37 | 0.24 | 14.90 | |  | | 15.82 |  | < .001 |
| *b1* | 2.43 | 0.25 | 1.91 | |  | | 2.93 |  | < .001 |
| *b2* | -0.28 | 0.34 | -0.97 | |  | | 0.37 |  | .397 |
| *b3* | -0.11 | 0.19 | -0.48 | |  | | 0.26 |  | .580 |
| *b4* | -0.70 | 0.27 | -1.28 | |  | | -0.17 |  | .010 |
| *b5* | 0.74 | 0.32 | 0.08 | |  | | 1.33 |  | .026 |
| *a1* | 2.15 | 0.30 | 1.53 | |  | | 2.72 |  | < .001 |
| *a2* | -0.08 | 0.29 | -0.69 | |  | | 0.43 |  | .765 |
| *a3* | 2.70 | 0.51 | 1.68 | |  | | 3.74 |  | < .001 |
| *a4* | 1.33 | 0.53 | 0.26 | |  | | 2.41 |  | .015 |
| *a5* | -0.85 | 0.41 | -1.61 | |  | | -0.02 |  | .045 |
| Affective impact |  |  |  | |  | |  |  |  |
| *b0* | 15.78 | 0.24 | 15.32 | |  | | 16.24 |  | < .001 |
| *b1* | 5.18 | 0.40 | 4.40 | |  | | 5.95 |  | < .001 |
| *b2* | -0.25 | 0.43 | -1.10 | |  | | 0.58 |  | .541 |
| *b3* | -0.94 | 0.34 | -1.62 | |  | | -0.29 |  | .005 |
| *b4* | -1.29 | 0.86 | -3.10 | |  | | 0.30 |  | .112 |
| *b5* | 0.61 | 0.78 | -0.99 | |  | | 2.07 |  | .472 |
| *a1* | 4.93 | 0.60 | 3.73 | |  | | 6.06 |  | <.001 |
| *a2* | -1.61 | 1.48 | -4.78 | |  | | 1.08 |  | .231 |
| *a3* | 5.44 | 0.58 | 4.33 | |  | | 6.54 |  | <.001 |
| *a4* | 0.96 | 0.85 | -0.74 | |  | | 2.70 |  | .260 |
| *a5* | -1.55 | 0.86 | -3.18 | |  | | 0.20 |  | .083 |
|  | Psychological Well-Being | | | | | | | | |
| *Frequency* |  |  |  | |  | |  |  |  |
| *b0* | 88.71 | 0.64 | 87.46 | |  | | 89.97 |  | <.001 |
| *b1* | -7.53 | 0.64 | -8.83 |  | | -6.29 | |  | < .001 |
| *b2* | 3.68 | 0.65 | 2.41 |  | | 4.95 | |  | < .001 |
| *b3* | 0.84 | 0.41 | 0.04 |  | | 1.65 | |  | .039 |
| *b4* | 0.69 | 0.56 | -0.47 |  | | 1.78 | |  | .251 |
| *b5* | -1.01 | 0.57 | -2.19 |  | | 0.07 | |  | .067 |
| *a1* | -3.84 | 0.63 | -5.13 |  | | -2.64 | |  | < .001 |
| *a2* | 0.51 | 0.64 | -0.92 |  | | 1.63 | |  | .464 |
| *a3* | -11.21 | 1.12 | -13.44 |  | | -9.01 | |  | < .001 |
| *a4* | -0.87 | 1.00 | -2.83 |  | | 1.18 | |  | .398 |
| *a5* | 1.85 | 0.77 | 0.38 |  | | 3.39 | |  | .014 |
| Discrepancy |  |  |  |  | |  | |  |  |
| *b0* | 89.24 | 0.67 | 87.94 |  | | 90.55 | |  | < .001 |
| *b1* | -7.51 | 0.77 | -9.11 |  | | -6.04 | |  | < .001 |
| *b2* | 2.41 | 0.92 | 0.60 |  | | 4.27 | |  | .012 |
| *b3* | 1.47 | 0.57 | 0.39 |  | | 2.64 | |  | .007 |
| *b4* | 1.35 | 0.79 | -0.31 |  | | 2.81 | |  | .120 |
| *b5* | -2.58 | 0.83 | -4.31 |  | | -1.01 | |  | .001 |
| *a1* | -5.09 | 0.80 | -6.71 |  | | -3.60 | |  | < .001 |
| *a2* | 0.24 | 0.78 | -1.42 |  | | 1.63 | |  | .804 |
| *a3* | -9.92 | 1.51 | -13.02 |  | | -7.01 | |  | < .001 |
| *a4* | -2.46 | 1.50 | -5.29 |  | | 0.70 | |  | .124 |
| *a5* | 4.05 | 1.10 | 1.99 |  | | 6.33 | |  | < .001 |
| Affective Impact |  |  |  |  | |  | |  |  |
| *b0* | 88.29 | 0.68 | 86.96 |  | | 89.61 | |  | < .001 |
| *b1* | -10.29 | 1.22 | -12.73 |  | | -7.90 | |  | < .001 |
| *b2* | 8.63 | 1.25 | 6.18 |  | | 11.12 | |  | < .001 |
| *b3* | 4.01 | 1.05 | 2.04 |  | | 6.21 | |  | < .001 |
| *b4* | 6.72 | 2.43 | 2.17 |  | | 11.76 | |  | .004 |
| *b5* | -2.34 | 1.92 | -6.30 |  | | 1.39 | |  | .230 |
| *a1* | -1.67 | 1.85 | -5.31 |  | | 1.88 | |  | .363 |
| *a2* | 8.39 | 3.88 | 0.97 |  | | 16.48 | |  | .027 |
| *a3* | -18.92 | 1.64 | -22.24 |  | | -15.68 | |  | < .001 |
| *a4* | -5.05 | 2.55 | -10.30 |  | | -0.03 | |  | .049 |
| *a5* | 6.34 | 2.17 | 2.21 |  | | 10.89 | |  | .001 |
|  | Self-Esteem | | | | | | | | |
| *Frequency* |  |  |  |  | |  | |  |  |
| *b0* | 29.23 | 0.23 | 28.78 |  | | 29.67 | |  | < .001 |
| *b1* | -3.52 | 0.22 | -3.95 |  | | -3.07 | |  | < .001 |
| *b2* | 1.88 | 0.24 | 1.41 |  | | 2.34 | |  | < .001 |
| *b3* | 0.18 | 0.15 | -0.12 |  | | 0.48 | |  | .239 |
| *b4* | 0.44 | 0.20 | 0.07 |  | | 0.84 | |  | .021 |
| *b5* | -0.70 | 0.21 | -1.10 |  | | -0.28 | |  | .002 |
| *a1* | -1.64 | 0.23 | -2.09 |  | | -1.19 | |  | < .001 |
| *a2* | -0.08 | 0.21 | -0.48 |  | | 0.37 | |  | .712 | |
| *a3* | -5.40 | 0.40 | -6.18 |  | | -4.59 | |  | < .001 | |
| *a4* | -0.96 | 0.37 | -1.71 |  | | -0.25 | |  | .008 | |
| *a5* | 0.88 | 0.28 | 0.32 |  | | 1.43 | |  | .002 | |
| Discrepancy |  |  |  |  | |  | |  |  | |
| *b0* | 29.24 | 0.25 | 28.76 |  | | 29.72 | |  | < .001 | |
| *b1* | -3.51 | 0.27 | -4.07 |  | | -2.98 | |  | < .001 | |
| *b2* | 1.76 | 0.33 | 1.12 |  | | 2.42 | |  | < .001 | |
| *b3* | 0.62 | 0.21 | 0.20 |  | | 1.05 | |  | .004 | |
| *b4* | 0.62 | 0.32 | -0.03 |  | | 1.26 | |  | .060 | |
| *b5* | -1.09 | 0.29 | -1.64 |  | | -0.49 | |  | < .001 | |
| *a1* | -1.76 | 0.28 | -2.31 |  | | -1.20 | |  | < .001 | |
| *a2* | 0.16 | 0.26 | -0.35 |  | | 0.71 | |  | .524 | |
| *a3* | -5.27 | 0.54 | -6.36 |  | | -4.22 | |  | < .001 | |
| *a4* | -1.09 | 0.62 | -2.31 |  | | 0.20 | |  | .090 | |
| *a5* | 1.71 | 0.36 | 0.98 |  | | 2.40 | |  | < .001 | |
| Affective Impact |  |  |  |  | |  | |  |  | |
| *b0* | 28.78 | 0.24 | 28.30 |  | | 29.25 | |  | < .001 | |
| *b1* | -5.91 | 0.44 | -6.78 |  | | -5.05 | |  | < .001 | |
| *b2* | 3.07 | 0.45 | 2.17 |  | | 3.98 | |  | < .001 | |
| *b3* | 1.43 | 0.36 | 0.75 |  | | 2.19 | |  | < .001 | |
| *b4* | 1.30 | 0.91 | -0.38 |  | | 3.20 | |  | .134 | |
| *b5* | -1.60 | 0.76 | -3.12 |  | | -0.04 | |  | .045 | |
| *a1* | -2.84 | 0.66 | -4.13 |  | | -1.52 | |  | < .001 | |
| *a2* | 1.13 | 1.51 | -1.74 |  | | 4.26 | |  | .432 | |
| *a3* | -8.98 | 0.59 | -10.18 |  | | -7.78 | |  | < .001 | |
| *a4* | -1.46 | 0.90 | -3.30 |  | | 0.29 | |  | .102 | |
| *a5* | 3.03 | 0.83 | 1.33 |  | | 4.72 | |  | < .001 | |

*Note.* *SE* = Standard error; CI = confidence interval; *b*0 = Intercept; *b*1 = aversive comparison component; *b*2 = appetitive comparison component; *b*3 = squared aversive comparison component; *b*4 = interaction term aversive and appetitive aversive comparison component; *b*5 = squared appetitive aversive comparison component. CIs and *p*-values are based on a bootstrap procedure with 10.000 iterations expect for the Intercept.

Part C: Supplemental Material for the analyses separately for women and men

Table s9

*Descriptive statistics for predictor pairs*

|  | Women | | | | |  | Men | | | | | |
| --- | --- | --- | --- | --- | --- | --- | --- | --- | --- | --- | --- | --- |
| Predictors | Outlier | *n* | Av. > App. | Av. = App. | Av. < App. |  | Outlier | *n* | Av. > App. | Av. = App. | Av. < App. |
| *Aversive and appetitive comparisons frequency* | 2 | 477 | 57% | 30% | 13% |  | 3 | 618 | 44% | 41% | 13% |
| *Aversive und appetitive comparisons discrepancy* | 3 | 476 | 64% | 27% | 9% |  | 2 | 619 | 52% | 38% | 10% |
| *Aversive and appetitive comparison affective impact* | 17 | 462 | 53% | 33% | 13% |  | 48 | 573 | 41% | 38% | 21% |

*Note.* Av. = aversive; app = appetitive. Data pairs are unequal when their scores differ at least by 0.5 z-scores.

Table s10

*Test for independence of residuals, normal distribution, homoscedasticity, and multicollinearity of the full model.*

|  | Women | | | | | | | | | | | | Men | | | | | | | | | | | | |
| --- | --- | --- | --- | --- | --- | --- | --- | --- | --- | --- | --- | --- | --- | --- | --- | --- | --- | --- | --- | --- | --- | --- | --- | --- | --- |
|  | Independence | |  | Normal distribution | |  | Homoscedasticity | | |  | Multicollinearity |  | | Independence | |  | Normal distribution | |  | Homoscedasticity | | |  | Multicollinearity |
|  | *DW* | *p* |  | *W* | *p* |  | *BP* | *df* | *p* |  | VIFmax |  | | *DW* | *p* |  | *W* | *p* |  | *BP* | *df* | *p* |  | VIFmax |
|  | Depression | | | | | | | | | | | | | | | | | | | | | | | | |
| Frequency | 1.95 | .560 |  | 0.977 | < .001 |  | 3.96 | 5 | .555 |  | 2.60 |  | | 1.98 | .794 |  | 0.976 | < .001 |  | 6.50 | 5 | .261 |  | 1.90 |
| Discrepancy | 1.92 | .373 |  | 0.974 | < .001 |  | 9.32 | 5 | .097 |  | 2.36 |  | | 1.96 | .600 |  | 0.973 | < .001 |  | 13.13 | 5 | .022 |  | 2.33 |
| Affective Impact | 1.94 | .514 |  | 0.985 | < .001 |  | 24.22 | 5 | < .001 |  | 4.17 |  | | 1.85 | .079 |  | 0.971 | < .001 |  | 10.72 | 5 | .057 |  | 2.67 |
|  | Psychological Well-Being | | | | | | | | | | | | | | | | | | | | | | | | |
| Frequency | 2.03 | .748 |  | 0.996 | .324 |  | 5.90 | 5 | .316 |  | 2.60 |  | | 2.05 | .567 |  | 0.997 | .272 |  | 7.65 | 5 | .176 |  | 1.90 |
| Discrepancy | 2.01 | .874 |  | 0.994 | .063 |  | 3.37 | 5 | .643 |  | 2.36 |  | | 2.02 | .810 |  | 0.995 | .058 |  | 9.72 | 5 | .084 |  | 2.33 |
| Affective Impact | 2.10 | .272 |  | 0.996 | .310 |  | 9.58 | 5 | .088 |  | 4.17 |  | | 1.96 | .630 |  | 0.997 | .331 |  | 11.35 | 5 | .045 |  | 2.70 |
|  | Self-Esteem | | | | | | | | | | | | | | | | | | | | | | | | |
| Frequency | 1.99 | .880 |  | 0.996 | .345 |  | 4.69 | 5 | .454 |  | 2.60 |  | | 1.96 | .576 |  | 0.997 | .373 |  | 12.07 | 5 | .034 |  | 1.90 |
| Discrepancy | 1.99 | .939 |  | 0.996 | .513 |  | 8.30 | 5 | .141 |  | 2.36 |  | | 1.97 | .689 |  | 0.996 | .164 |  | 24.76 | 5 | < .001 |  | 2.33 |
| Affective Impact | 1.95 | .602 |  | 0.99 | .016 |  | 6.51 | 5 | .259 |  | 4.17 |  | | 2.01 | .898 |  | 0.996 | .182 |  | 3.88 | 5 | .567 |  | 2.70 |

*Note.* *DW* = Durbin-Watson-Test, *W* = Shapiro-Wilk-Test. *BP* = Breusch-Pagan-Test. VIF = Variance-Inflation-Factor; *p* < .05 for the first three tests and VIF > 5 indicate a violation of the tested properties and are **bolded.**

Table s11

*Model selection separately for women and men*

| Women | | | | | | | |  | | Men | | | | | | | | | | | | | | | | | | | | |
| --- | --- | --- | --- | --- | --- | --- | --- | --- | --- | --- | --- | --- | --- | --- | --- | --- | --- | --- | --- | --- | --- | --- | --- | --- | --- | --- | --- | --- | --- | --- |
| Model | k | AICc | ΔAICc | Evidence ratio | CFI | *p*Modell | R2adj |  | | Model | | | k | | AICc | | ΔAICc | | | Evidence ratio | | | CFI | | | *p*Modell | | | R2adj | | |
| **Depression** | | | | | | | | | | | | | | | | | | | | | | | | | | | | | | | |
| Frequency |  | | | | | | | | | | | | | | | | | | | | | | | | | | | | | | |
| onlyx2 | 4 | 2965.28 | 0.00 | - | 1.00 | < .001 | 0.2093 |  | | SRSQD | | | 5 | | 3692.34 | | 0.00 | | | - | | | 1.00 | | | < .001 | | | 0.2669 | | |
| onlyx | 3 | 2965.77 | 0.49 | 1.28 | 1.00 | < .001 | 0.2067 |  | | SRRR | | | 6 | | 3693.30 | | 0.96 | | | 1.62 | | | 1.00 | | | < .001 | | | 0.2670 | | |
| SRSQD | 5 | 2966.56 | 1.28 | 1.90 | 1.00 | < .001 | 0.2088 |  | | SRR | | | 5 | | 3694.78 | | 2.44 | | | 3.39 | | | 0.99 | | | < .001 | | | 0.2640 | | |
| additive | 4 | 2966.64 | 1.36 | 1.97 | 1.00 | < .001 | 0.2070 |  | | **full** | | | **7** | | **3695.34** | | **3.00** | | | **4.48** | | | **1.00** | | | **< .001** | | | **0.2658** | | |
| SRR | 5 | 2966.81 | 1.53 | 2.15 | 1.00 | < .001 | 0.2084 |  | | additive | | | 4 | | 3706.59 | | 14.25 | | | 1242.37 | | | 0.92 | | | < .001 | | | 0.2486 | | |
| SRRR | 6 | 2968.09 | 2.81 | 4.08 | 1.00 | < .001 | 0.2080 |  | | IA | | | 5 | | 3706.92 | | 14.58 | | | 1466.35 | | | 0.93 | | | < .001 | | | 0.2494 | | |
| IA | 5 | 2968.38 | 3.11 | 4.73 | 1.00 | < .001 | 0.2058 |  | | onlyx2 | | | 4 | | 3709.77 | | 17.44 | | | 6110.37 | | | 0.91 | | | < .001 | | | 0.2447 | | |
| **full** | **7** | **2970.07** | **4.79** | **10.97** | **1.00** | **< .001** | **0.2065** |  | | onlyx | | | 3 | | 3723.59 | | 31.25 | | | 6.120992E+6 | | | 0.83 | | | < .001 | | | 0.2264 | | |
| RR | 4 | 2976.28 | 11.00 | 245.13 | 0.92 | < .001 | 0.1908 |  | | RR | | | 4 | | 3734.51 | | 42.18 | | | 1.440064E+9 | | | 0.78 | | | < .001 | | | 0.2139 | | |
| SSQD | 4 | 3004.13 | 38.85 | 2.730413E+8 | 0.66 | < .001 | 0.1422 |  | | SSQD | | | 4 | | 3739.24 | | 46.90 | | | 1.52840E+10 | | | 0.75 | | | < .001 | | | 0.2078 | | |
| SQD | 3 | 3019.45 | 54.18 | 5.80788E+11 | 0.51 | < .001 | 0.1122 |  | | SQD | | | 3 | | 3781.64 | | 89.30 | | | 2.45996E+19 | | | 0.53 | | | < .001 | | | 0.1502 | | |
| null | 2 | 3075.22 | 109.94 | 7.45659E+23 | 0.00 | - | 0.0000 |  | | null | | | 2 | | 3881.18 | | 188.84 | | | 1.01501E+41 | | | 0.00 | | | - | | | 0.0000 | | |
| onlyy | 3 | 3076.79 | 111.51 | 1.63845E+24 | 0.00 | .503 | -0.0012 |  | | onlyy | | | 3 | | 3882.90 | | 190.56 | | | 2.40066E+41 | | | 0.00 | | | .586 | | | -0.0011 | | |
| onlyy2 | 4 | 3078.55 | 113.27 | 3.94409E+24 | 0.00 | .696 | -0.0027 |  | | onlyy2 | | | 4 | | 3884.84 | | 192.50 | | | 6.33728E+41 | | | 0.00 | | | .827 | | | -0.0026 | | |
| Discrepancy |  |  |  |  |  |  |  |  | |  | | |  | |  | |  | | |  | | |  | | |  | | |  | | |
| IA | 5 | 3026.28 | 0.00 | **-** | 0.99 | < .001 | 0.0926 |  | | SRR | | | 5 | | 3785.94 | | 0.00 | | | **-** | | | 1.00 | | | < .001 | | | 0.1590 | | |
| additive | 4 | 3027.40 | 1.12 | 1.75 | 0.95 | < .001 | 0.0885 |  | | SRRR | | | 6 | | 3787.03 | | 1.09 | | | 1.73 | | | 1.00 | | | < .001 | | | 0.1589 | | |
| SRRR | 6 | 3027.60 | 1.32 | 1.94 | 0.99 | < .001 | 0.0920 |  | | IA | | | 5 | | 3788.11 | | 2.17 | | | 2.95 | | | 0.99 | | | < .001 | | | 0.1560 | | |
| **full** | **7** | **3028.07** | **1.79** | **2.45** | **1.00** | **< .001** | **0.0932** |  | | additive | | | 4 | | 3788.37 | | 2.43 | | | 3.37 | | | 0.97 | | | < .001 | | | 0.1543 | | |
| SRSQD | 5 | 3028.59 | 2.31 | 3.17 | 0.94 | < .001 | 0.0882 |  | | **full** | | | **7** | | **3788.74** | | **2.80** | | | **4.05** | | | **1.00** | | | **< .001** | | | **0.1580** | | |
| onlyx2 | 4 | 3028.81 | 2.52 | 3.53 | 0.92 | < .001 | 0.0858 |  | | SRSQD | | | 5 | | 3789.12 | | 3.18 | | 4.90 | | | 0.98 | | | < .001 | | | 0.1547 | | |
| SRR | 5 | 3028.87 | 2.59 | 3.65 | 0.94 | < .001 | 0.0876 |  | | onlyx | | | 3 | | 3802.74 | | 16.80 | | 4449.21 | | | 0.83 | | | < .001 | | | 0.1330 | | |
| onlyx | 3 | 3028.99 | 2.71 | 3.87 | 0.89 | < .001 | 0.0834 |  | | RR | | | 4 | | 3803.91 | | 17.97 | | 7977.82 | | | 0.83 | | | < .001 | | | 0.1328 | | |
| RR | 4 | 3034.75 | 8.47 | 68.95 | 0.79 | < .001 | 0.0743 |  | | onlyx2 | | | 4 | | 3804.57 | | 18.63 | | 11096.32 | | | 0.82 | | | < .001 | | | 0.1319 | | |
| SSQD | 4 | 3039.32 | 13.03 | 676.34 | 0.69 | < .001 | 0.0654 |  | | SSQD | | | 4 | | 3809.24 | | 23.30 | | 114756.45 | | | 0.78 | | | < .001 | | | 0.1253 | | |
| SQD | 3 | 3047.80 | 21.51 | 46933.98 | 0.49 | < .001 | 0.0465 |  | | SQD | | | 3 | | 3831.53 | | 45.59 | | 7.944742E+9 | | | 0.56 | | | < .001 | | | 0.0917 | | |
| null | 2 | 3069.44 | 43.16 | 2.350787E+9 | 0.00 | - | 0.0000 |  | | null | | | 2 | | 3890.06 | | 104.12 | | 4.05934E+22 | | | 0.00 | | | - | | | 0.0000 | | |
| onlyy | 3 | 3071.34 | 45.06 | 6.085264E+9 | 0.00 | .726 | -0.0019 |  | | onlyy | | | 3 | | 3891.95 | | 106.01 | | 1.04582E+23 | | | 0.00 | | | .722 | | | -0.0014 | | |
| onlyy2 | 4 | 3073.30 | 47.02 | 1.61920E+10 | 0.00 | .905 | -0.0038 |  | | onlyy2 | | | 4 | | 3893.89 | | 107.95 | | 2.75860E+23 | | | 0.00 | | | .899 | | | -0.0029 | | |
| Affective impact |  |  |  |  |  |  |  |  | |  | | |  | |  | |  | |  | | |  | | |  | | |  | | |
| onlyx2 | 4 | 2836.67 | 0.00 | - | 1.00 | < .001 | 0.2712 |  | | **full** | | | **7** | | **3409.04** | | **0.00** | | **-** | | | **1.00** | | | **< .001** | | | **0.2117** | | |
| onlyx | 3 | 2837.51 | 0.84 | 1.52 | 1.00 | < .001 | 0.2682 |  | | SRRR | | | 6 | | 3410.19 | | 1.15 | | 1.78 | | | 0.98 | | | < .001 | | | 0.2087 | | |
| SRSQD | 5 | 2838.15 | 1.48 | 2.10 | 1.00 | < .001 | 0.2705 |  | | IA | | | 5 | | 3412.71 | | 3.67 | | 6.27 | | | 0.96 | | | < .001 | | | 0.2037 | | |
| SRR | 5 | 2839.02 | 2.35 | 3.23 | 1.00 | < .001 | 0.2691 |  | | onlyx2 | | | 4 | | 3416.68 | | 7.64 | | 45.67 | | | 0.92 | | | < .001 | | | 0.1967 | | |
| additive | 4 | 2839.10 | 2.43 | 3.37 | 1.00 | < .001 | 0.2673 |  | | SRSQD | | | 5 | | 3417.99 | | 8.96 | | 88.04 | | | 0.92 | | | < .001 | | | 0.1963 | | |
| SRRR | 6 | 2840.19 | 3.51 | 5.79 | 1.00 | < .001 | 0.2689 |  | | onlyx | | | 3 | | 3418.73 | | 9.69 | | 127.05 | | | 0.90 | | | < .001 | | | 0.1924 | | |
| IA | 5 | 2841.04 | 4.37 | 8.89 | 0.99 | < .001 | 0.2659 |  | | additive | | | 4 | | 3420.31 | | 11.27 | | 280.31 | | | 0.89 | | | < .001 | | | 0.1916 | | |
| **full** | **7** | **2841.68** | **5.01** | **12.26** | **1.00** | **< .001** | **0.2682** |  | | SRR | | | 5 | | 3421.69 | | 12.65 | | 557.83 | | | 0.89 | | | < .001 | | | 0.1911 | | |
| SSQD | 4 | 2855.62 | 18.95 | 13021.74 | 0.88 | < .001 | 0.2406 |  | | SSQD | | | 4 | | 3437.36 | | 28.32 | | 1413302.53 | | | 0.77 | | | < .001 | | | 0.1672 | | |
| RR | 4 | 2866.00 | 29.33 | 2338451.74 | 0.81 | < .001 | 0.2234 |  | | RR | | | 4 | | 3448.26 | | 39.22 | | 3.283891E+8 | | | 0.69 | | | < .001 | | | 0.1511 | | |
| SQD | 3 | 2893.34 | 56.67 | 2.01913E+12 | 0.61 | < .001 | 0.1742 |  | | SQD | | | 3 | | 3467.09 | | 58.05 | | 4.02888E+12 | | | 0.54 | | | < .001 | | | 0.1212 | | |
| onlyy | 3 | 2971.96 | 135.28 | 2.37923E+29 | 0.07 | .001 | 0.0210 |  | | onlyy | | | 3 | | 3538.53 | | 129.49 | | 1.31242E+28 | | | 0.02 | | | .064 | | | 0.0043 | | |
| onlyy2 | 4 | 2973.95 | 137.28 | 6.45500E+29 | 0.06 | .010 | 0.0190 |  | | null | | | 2 | | 3539.95 | | 130.91 | | 2.67139E+28 | | | 0.00 | | | - | | | 0.0000 | | |
| null | 2 | 2980.75 | 144.08 | 1.93364E+31 | 0.00 | - | 0.0000 |  | | onlyy2 | | | 4 | | 3540.21 | | 131.17 | | 3.04385E+28 | | | 0.01 | | | .152 | | | 0.0031 | | |
| **Psychological Well-Being** | | | | | | | | | | | | | | | | | | | | | | | | | | | | | | |
| Frequency |  | | | | | | | | | | | | | | | | | | | | | | | | | | | | | |
| SRRR | 6 | 3926.37 | 0.00 | **-** | 1.00 | < .001 | 0.1996 |  | | SRRR | | | 6 | | 5062.70 | | 0.00 | | **-** | | | 1.00 | | | < .001 | | | 0.2015 | | |
| SRR | 5 | 3927.00 | 0.64 | 1.37 | 0.99 | < .001 | 0.1967 |  | | SRSQD | | | 5 | | 5063.34 | | 0.64 | | 1.38 | | | 0.99 | | | < .001 | | | 0.1993 | | |
| additive | 4 | 3927.02 | 0.65 | 1.38 | 0.98 | < .001 | 0.1950 |  | | **full** | | | **7** | | **5063.54** | | **0.84** | | **1.52** | | | **1.00** | | | **< .001** | | | **0.2018** | | |
| **full** | **7** | **3928.38** | **2.02** | **2.74** | **1.00** | **< .001** | **0.1979** |  | | additive | | | 4 | | 5064.70 | | 2.00 | | 2.72 | | | 0.97 | | | < .001 | | | 0.1962 | | |
| SRSQD | 5 | 3928.46 | 2.09 | 2.85 | 0.98 | < .001 | 0.1943 |  | | SRR | | | 5 | | 5066.10 | | 3.40 | | 5.47 | | | 0.97 | | | < .001 | | | 0.1958 | | |
| IA | 5 | 3928.47 | 2.10 | 2.86 | 0.98 | < .001 | 0.1943 |  | | IA | | | 5 | | 5066.24 | | 3.54 | | 5.87 | | | 0.97 | | | < .001 | | | 0.1956 | | |
| SSQD | 4 | 3935.07 | 8.70 | 77.66 | 0.91 | < .001 | 0.1813 |  | | onlyx | | | 3 | | 5087.76 | | 25.06 | | 276512.38 | | | 0.80 | | | < .001 | | | 0.1643 | | |
| onlyx | 3 | 3942.69 | 16.33 | 3508.08 | 0.82 | < .001 | 0.1663 |  | | onlyx2 | | | 4 | | 5088.28 | | 25.58 | | 359099.81 | | | 0.80 | | | < .001 | | | 0.1650 | | |
| onlyx2 | 4 | 3943.59 | 17.22 | 5492.43 | 0.83 | < .001 | 0.1665 |  | | SSQD | | | 4 | | 5090.29 | | 27.59 | | 979340.86 | | | 0.79 | | | < .001 | | | 0.1623 | | |
| RR | 4 | 3945.67 | 19.30 | 15519.89 | 0.81 | < .001 | 0.1629 |  | | RR | | | 4 | | 5134.82 | | 72.12 | | 4.57761E+15 | | | 0.47 | | | < .001 | | | 0.0997 | | |
| SQD | 3 | 3957.97 | 31.61 | 7299752.68 | 0.68 | < .001 | 0.1391 |  | | SQD | | | 3 | | 5161.68 | | 98.99 | | 3.12238E+21 | | | 0.27 | | | < .001 | | | 0.0581 | | |
| onlyy | 3 | 4025.12 | 98.75 | 2.78165E+21 | 0.04 | .021 | 0.0090 |  | | null | | | 2 | | 5197.67 | | 134.97 | | 2.03286E+29 | | | 0.00 | | | - | | | 0.0000 | | |
| onlyy2 | 4 | 4025.69 | 99.32 | 3.69637E+21 | 0.05 | .034 | 0.0100 |  | | onlyy | | | 3 | | 5199.14 | | 136.44 | | 4.25012E+29 | | | 0.00 | | | .461 | | | -0.0007 | | |
| null | 2 | 4028.41 | 102.04 | 1.44133E+22 | 0.00 | - | 0.0000 |  | | onlyy2 | | | 4 | | 5200.56 | | 137.86 | | 8.63621E+29 | | | 0.00 | | | .564 | | | -0.0014 | | |
| Discrepancy |  |  |  |  |  |  |  |  | |  | | |  | |  | |  | |  | | |  | | |  | | |  | | |
| **full** | **7** | **3959.10** | **0.00** | **-** | **1.00** | **< .001** | **0.1307** |  | | SRRR | | | 6 | | 5096.97 | | 0.00 | | **-** | | | 0.99 | | | < .001 | | | 0.1696 | | |
| SRRR | 6 | 3960.25 | 1.15 | 1.78 | 0.97 | < .001 | 0.1267 |  | | additive | | | 4 | | 5097.29 | | 0.33 | | 1.18 | | | 0.97 | | | < .001 | | | 0.1664 | | |
| SRR | 5 | 3968.43 | 9.33 | 106.11 | 0.83 | < .001 | 0.1096 |  | | **full** | | | **7** | | **5097.36** | | **0.39** | | **1.22** | | | **1.00** | | | **< .001** | | | **0.1704** | | |
| additive | 4 | 3968.60 | 9.51 | 115.87 | 0.81 | < .001 | 0.1073 |  | | IA | | | 5 | | 5097.73 | | 0.76 | | 1.47 | | | 0.98 | | | < .001 | | | 0.1672 | | |
| SRSQD | 5 | 3968.83 | 9.73 | 129.80 | 0.82 | < .001 | 0.1088 |  | | SRSQD | | | 5 | | 5098.26 | | 1.29 | | 1.91 | | | 0.97 | | | < .001 | | | 0.1665 | | |
| IA | 5 | 3969.79 | 10.69 | 209.82 | 0.81 | < .001 | 0.1070 |  | | SRR | | | 5 | | 5099.33 | | 2.36 | | 3.25 | | | 0.96 | | | < .001 | | | 0.1650 | | |
| SSQD | 4 | 3974.46 | 15.36 | 2164.38 | 0.72 | < .001 | 0.0963 |  | | SSQD | | | 4 | | 5115.65 | | 18.68 | | 11359.54 | | | 0.82 | | | < .001 | | | 0.1413 | | |
| RR | 4 | 3975.74 | 16.64 | 4102.94 | 0.70 | < .001 | 0.0939 |  | | onlyx | | | 3 | | 5122.39 | | 25.42 | | 331103.61 | | | 0.75 | | | < .001 | | | 0.1305 | | |
| onlyx | 3 | 3977.23 | 18.13 | 8646.17 | 0.67 | < .001 | 0.0890 |  | | onlyx2 | | | 4 | | 5122.62 | | 25.65 | | 371859.86 | | | 0.75 | | | < .001 | | | 0.1316 | | |
| onlyx2 | 4 | 3978.24 | 19.14 | 14325.37 | 0.67 | < .001 | 0.0891 |  | | RR | | | 4 | | 5140.69 | | 43.72 | | 3.113832E+9 | | | 0.60 | | | < .001 | | | 0.1058 | | |
| SQD | 3 | 3984.07 | 24.97 | 264822.59 | 0.56 | < .001 | 0.0759 |  | | SQD | | | 3 | | 5162.11 | | 65.14 | | 1.39953E+14 | | | 0.40 | | | < .001 | | | 0.0728 | | |
| onlyy2 | 4 | 4013.86 | 54.76 | 7.78607E+11 | 0.13 | .005 | 0.0183 |  | | null | | | 2 | | 5207.90 | | 110.93 | | 1.22544E+24 | | | 0.00 | | | - | | | 0.0000 | | |
| onlyy | 3 | 4020.21 | 61.11 | 1.86083E+13 | 0.02 | .121 | 0.0030 |  | | onlyy | | | 3 | | 5209.51 | | 112.54 | | 2.73608E+24 | | | 0.00 | | | .521 | | | -0.0010 | | |
| null | 2 | 4020.60 | 61.50 | 2.26189E+13 | 0.00 | - | 0.0000 |  | | onlyy2 | | | 4 | | 5211.48 | | 114.51 | | 7.32846E+24 | | | 0.00 | | | .792 | | | -0.0025 | | |
| Affective Impact |  |  |  |  |  |  |  |  | |  | | |  | |  | |  | |  | | |  | | |  | | |  | | |
| **full** | **7** | **3808.25** | **0.00** | **-** | **1.00** | **< .001** | **0.1853** |  | | **full** | | | **7** | | **4668.53** | | **0.00** | | **-** | | | **1.00** | | | **< .001** | | | **0.2175** | | |
| IA | 5 | 3808.60 | 0.35 | 1.19 | 0.97 | < .001 | 0.1810 |  | | SRRR | | | 6 | | 4669.63 | | 1.10 | | 1.73 | | | 0.98 | | | < .001 | | | 0.2145 | | |
| SRRR | 6 | 3809.59 | 1.34 | 1.95 | 0.97 | < .001 | 0.1811 |  | | IA | | | 5 | | 4673.24 | | 4.70 | | 10.50 | | | 0.95 | | | < .001 | | | 0.2082 | | |
| SSQD | 4 | 3813.34 | 5.09 | 12.72 | 0.91 | < .001 | 0.1707 |  | | SSQD | | | 4 | | 4675.89 | | 7.35 | | 39.51 | | | 0.93 | | | < .001 | | | 0.2031 | | |
| additive | 4 | 3813.74 | 5.49 | 15.55 | 0.91 | < .001 | 0.1699 |  | | additive | | | 4 | | 4675.94 | | 7.40 | | 40.52 | | | 0.93 | | | < .001 | | | 0.2030 | | |
| SRR | 5 | 3815.16 | 6.91 | 31.60 | 0.90 | < .001 | 0.1692 |  | | SRR | | | 5 | | 4677.92 | | 9.38 | | 109.12 | | | 0.92 | | | < .001 | | | 0.2017 | | |
| SRSQD | 5 | 3815.38 | 7.13 | 35.30 | 0.90 | < .001 | 0.1689 |  | | SRSQD | | | 5 | | 4677.97 | | 9.44 | | 112.05 | | | 0.92 | | | < .001 | | | 0.2016 | | |
| onlyx | 3 | 3819.57 | 11.32 | 286.90 | 0.84 | < .001 | 0.1575 |  | | onlyx2 | | | 4 | | 4705.82 | | 37.28 | | 1.246915E+8 | | | 0.71 | | | < .001 | | | 0.1603 | | |
| onlyx2 | 4 | 3820.44 | 12.19 | 444.03 | 0.84 | < .001 | 0.1578 |  | | onlyx | | | 3 | | 4706.80 | | 38.26 | | 2.036425E+8 | | | 0.70 | | | < .001 | | | 0.1574 | | |
| SQD | 3 | 3829.69 | 21.44 | 45283.95 | 0.73 | < .001 | 0.1389 |  | | SQD | | | 3 | | 4747.69 | | 79.16 | | 1.54294E+17 | | | 0.41 | | | < .001 | | | 0.0950 | | |
| RR | 4 | 3829.84 | 21.59 | 48717.52 | 0.74 | < .001 | 0.1405 |  | | RR | | | 4 | | 4749.12 | | 80.58 | | 3.14849E+17 | | | 0.40 | | | < .001 | | | 0.0944 | | |
| onlyy2 | 4 | 3877.43 | 69.18 | 1.05029E+15 | 0.24 | < .001 | 0.0472 |  | | onlyy | | | 3 | | 4764.88 | | 96.35 | | 8.34664E+20 | | | 0.28 | | | < .001 | | | 0.0675 | | |
| onlyy | 3 | 3878.38 | 70.13 | 1.69003E+15 | 0.22 | < .001 | 0.0432 |  | | onlyy2 | | | 4 | | 4765.86 | | 97.32 | | 1.35900E+21 | | | 0.29 | | | < .001 | | | 0.0676 | | |
| null | 2 | 3897.74 | 89.48 | 2.69924E+19 | 0.00 | - | 0.0000 |  | | null | | | 2 | | 4803.89 | | 135.36 | | 2.47312E+29 | | | 0.00 | | | - | | | 0.0000 | | |
| Self-Esteem | | | | | | | | | | | | | | | | | | | | | | | | | | | | | | |
| Frequency |  |  |  |  |  |  |  |  | | |  | |  | |  | |  | |  | | |  | | |  | | |  | | |
| SRRR | 6 | 2954.10 | 0.00 | **-** | 1.00 | < .001 | 0.3313 |  | | | **full** | | **7** | | **3851.51** | | **0.00** | | **-** | | | **1.00** | | | **< .001** | | | **0.2832** | | |
| SRR | 5 | 2955.97 | 1.87 | 2.55 | 0.99 | < .001 | 0.3272 |  | | | SRSQD | | 5 | | 3852.72 | | 1.21 | | 1.83 | | | 0.98 | | | < .001 | | | 0.2794 | | |
| **full** | **7** | **2956.14** | **2.04** | **2.78** | **1.00** | **< .001** | **0.3299** |  | | | IA | | 5 | | 3853.58 | | 2.06 | | 2.81 | | | 0.98 | | | < .001 | | | 0.2784 | | |
| additive | 4 | 2957.20 | 3.10 | 4.71 | 0.98 | < .001 | 0.3240 |  | | | SRRR | | 6 | | 3853.63 | | 2.11 | | 2.88 | | | 0.98 | | | < .001 | | | 0.2796 | | |
| SRSQD | 5 | 2958.17 | 4.07 | 7.65 | 0.98 | < .001 | 0.3241 |  | | | additive | | 4 | | 3855.93 | | 4.41 | | 9.07 | | | 0.96 | | | < .001 | | | 0.2745 | | |
| IA | 5 | 2958.81 | 4.71 | 10.52 | 0.98 | < .001 | 0.3232 |  | | | SRR | | 5 | | 3857.22 | | 5.71 | | 17.33 | | | 0.96 | | | < .001 | | | 0.2742 | | |
| SSQD | 4 | 2978.55 | 24.45 | 203702.55 | 0.87 | < .001 | 0.2930 |  | | | SSQD | | 4 | | 3868.21 | | 16.69 | | 4210.50 | | | 0.90 | | | < .001 | | | 0.2599 | | |
| onlyx2 | 4 | 2982.96 | 28.86 | 1848938.44 | 0.84 | < .001 | 0.2865 |  | | | onlyx | | 3 | | 3925.12 | | 73.61 | | 9.63400E+15 | | | 0.62 | | | < .001 | | | 0.1872 | | |
| onlyx | 3 | 2983.75 | 29.65 | 2749280.84 | 0.83 | < .001 | 0.2837 |  | | | onlyx2 | | 4 | | 3927.08 | | 75.57 | | 2.56539E+16 | | | 0.62 | | | < .001 | | | 0.1860 | | |
| RR | 4 | 2993.32 | 39.22 | 3.284416E+8 | 0.79 | < .001 | 0.2708 |  | | | RR | | 4 | | 3960.44 | | 108.92 | | 4.48709E+23 | | | 0.46 | | | < .001 | | | 0.1408 | | |
| SQD | 3 | 3023.45 | 69.35 | 1.14593E+15 | 0.63 | < .001 | 0.2216 |  | | | SQD | | 3 | | 3974.11 | | 122.60 | | 4.18770E+26 | | | 0.38 | | | < .001 | | | 0.1201 | | |
| onlyy | 3 | 3137.64 | 183.54 | 7.18094E+39 | 0.03 | .012 | 0.0110 |  | | | onlyy | | 3 | | 4043.97 | | 192.46 | | 6.19715E+41 | | | 0.04 | | | .001 | | | 0.0148 | | |
| onlyy2 | 4 | 3137.73 | 183.63 | 7.50442E+39 | 0.03 | .017 | 0.0130 |  | | | onlyy2 | | 4 | | 4045.63 | | 194.11 | | 1.41662E+42 | | | 0.04 | | | .005 | | | 0.0138 | | |
| null | 2 | 3141.91 | 187.81 | 6.06907E+40 | 0.00 | - | 0.0000 |  | | | null | | 2 | | 4052.19 | | 200.67 | | 3.76500E+43 | | | 0.00 | | | - | | | 0.0000 | | |
| Discrepancy |  |  |  |  |  |  |  |  | | |  | |  | |  | |  | |  | | |  | | |  | | |  | | |
| **full** | **7** | **3034.09** | **0.00** | **-** | **1.00** | **< .001** | **0.2019** |  | | | SRRR | | 6 | | 3909.04 | | 0.00 | | **-** | | | 0.99 | | | < .001 | | | 0.2200 | | |
| SRRR | 6 | 3038.20 | 4.10 | 7.79 | 0.95 | < .001 | 0.1932 |  | | | **full** | | **7** | | **3909.11** | | **0.07** | | **1.04** | | | **1.00** | | | **< .001** | | | **0.2212** | | |
| SRSQD | 5 | 3041.33 | 7.24 | 37.26 | 0.91 | < .001 | 0.1861 |  | | | IA | | 5 | | 3910.89 | | 1.85 | | 2.52 | | | 0.98 | | | < .001 | | | 0.2164 | | |
| IA | 5 | 3042.74 | 8.65 | 75.50 | 0.90 | < .001 | 0.1836 |  | | | additive | | 4 | | 3914.15 | | 5.11 | | 12.87 | | | 0.95 | | | < .001 | | | 0.2109 | | |
| additive | 4 | 3043.69 | 9.59 | 121.16 | 0.88 | < .001 | 0.1802 |  | | | SRR | | 5 | | 3916.10 | | 7.06 | | 34.11 | | | 0.94 | | | < .001 | | | 0.2097 | | |
| SRR | 5 | 3043.76 | 9.67 | 125.57 | 0.89 | < .001 | 0.1819 |  | | | SRSQD | | 5 | | 3916.12 | | 7.07 | | 34.36 | | | 0.94 | | | < .001 | | | 0.2097 | | |
| SSQD | 4 | 3050.52 | 16.43 | 3688.04 | 0.82 | < .001 | 0.1684 |  | SSQD | | | 4 | | 3919.20 | | 10.16 | | 160.75 | | | 0.91 | | | < .001 | | | 0.2044 | | |
| RR | 4 | 3064.53 | 30.43 | 4061693.45 | 0.69 | < .001 | 0.1436 |  | onlyx2 | | | 4 | | 3978.43 | | 69.39 | | 1.16935E+15 | | | 0.53 | | | < .001 | | | 0.1246 | | |
| onlyx2 | 4 | 3067.33 | 33.24 | 16526852.94 | 0.66 | < .001 | 0.1385 |  | onlyx | | | 3 | | 3979.20 | | 70.16 | | 1.71650E+15 | | | 0.52 | | | < .001 | | | 0.1220 | | |
| onlyx | 3 | 3067.68 | 33.59 | 19656149.44 | 0.65 | < .001 | 0.1360 |  | RR | | | 4 | | 3980.95 | | 71.90 | | 4.10802E+15 | | | 0.52 | | | < .001 | | | 0.1210 | | |
| SQD | 3 | 3074.84 | 40.75 | 7.059982E+8 | 0.58 | < .001 | 0.1229 |  | SQD | | | 3 | | 3987.99 | | 78.94 | | 1.38637E+17 | | | 0.46 | | | < .001 | | | 0.1095 | | |
| onlyy2 | 4 | 3128.31 | 94.22 | 2.88279E+20 | 0.09 | .003 | 0.0207 |  | onlyy | | | 3 | | 4050.49 | | 141.45 | | 5.19230E+30 | | | 0.06 | | | .001 | | | 0.0149 | | |
| onlyy | 3 | 3130.63 | 96.54 | 9.17599E+20 | 0.06 | .006 | 0.0138 |  | onlyy2 | | | 4 | | 4051.94 | | 142.90 | | 1.07095E+31 | | | 0.06 | | | .005 | | | 0.0142 | | |
| null | 2 | 3136.24 | 102.15 | 1.51611E+22 | 0.00 |  | 0.0000 |  | null | | | 2 | | 4058.74 | | 149.70 | | 3.20700E+32 | | | 0.00 | | |  | | | 0.0000 | | |
| Affective Impact |  |  |  |  |  |  |  |  |  | | |  | |  | |  | |  | | |  | | |  | | |  | | |
| **full** | **7** | **2845.32** | **0.00** | **-** | **1.00** | **< .001** | **0.3487** |  | **full** | | | **7** | | **3548.86** | | **0.00** | | **-** | | | **1.00** | | | **< .001** | | | **0.2828** | | |
| SRRR | 6 | 2846.30 | 0.98 | 1.63 | 0.99 | < .001 | 0.3458 |  | SRRR | | | 6 | | 3549.78 | | 0.92 | | 1.59 | | | 0.99 | | | < .001 | | | 0.2804 | | |
| SRSQD | 5 | 2848.50 | 3.18 | 4.90 | 0.97 | < .001 | 0.3412 |  | IA | | | 5 | | 3550.62 | | 1.76 | | 2.41 | | | 0.98 | | | < .001 | | | 0.2780 | | |
| additive | 4 | 2848.89 | 3.57 | 5.95 | 0.97 | < .001 | 0.3392 |  | SRSQD | | | 5 | | 3553.04 | | 4.18 | | 8.09 | | | 0.97 | | | < .001 | | | 0.2750 | | |
| IA | 5 | 2849.19 | 3.88 | 6.94 | 0.97 | < .001 | 0.3402 |  | additive | | | 4 | | 3554.17 | | 5.32 | | 14.26 | | | 0.96 | | | < .001 | | | 0.2722 | | |
| onlyx2 | 4 | 2849.99 | 4.67 | 10.33 | 0.96 | < .001 | 0.3376 |  | SSQD | | | 4 | | 3555.03 | | 6.17 | | 21.91 | | | 0.95 | | | < .001 | | | 0.2711 | | |
| SRR | 5 | 2850.74 | 5.42 | 15.01 | 0.96 | < .001 | 0.3380 |  | SRR | | | 5 | | 3555.83 | | 6.97 | | 32.65 | | | 0.95 | | | < .001 | | | 0.2714 | | |
| onlyx | 3 | 2851.64 | 6.32 | 23.60 | 0.95 | < .001 | 0.3338 |  | onlyx | | | 3 | | 3585.04 | | 36.18 | | 71935593.57 | | | 0.79 | | | < .001 | | | 0.2306 | | |
| SSQD | 4 | 2860.40 | 15.08 | 1881.05 | 0.91 | < .001 | 0.3225 |  | onlyx2 | | | 4 | | 3585.56 | | 36.70 | | 93025961.59 | | | 0.79 | | | < .001 | | | 0.2312 | | |
| RR | 4 | 2888.03 | 42.71 | 1.88548E+09 | 0.77 | < .001 | 0.2808 |  | RR | | | 4 | | 3644.69 | | 95.83 | | 6.45362E+20 | | | 0.48 | | | < .001 | | | 0.1477 | | |
| SQD | 3 | 2907.96 | 62.64 | 3.99763E+13 | 0.66 | < .001 | 0.2474 |  | SQD | | | 3 | | 3645.99 | | 97.13 | | 1.23727E+21 | | | 0.47 | | | < .001 | | | 0.1442 | | |
| onlyy2 | 4 | 3013.89 | 168.57 | 4.01774E+36 | 0.13 | < .001 | 0.0555 |  | onlyy | | | 3 | | 3695.05 | | 146.19 | | 5.55517E+31 | | | 0.21 | | | < .001 | | | 0.0677 | | |
| onlyy | 3 | 3017.08 | 171.76 | 1.98475E+37 | 0.11 | < .001 | 0.0469 |  | onlyy2 | | | 4 | | 3696.43 | | 147.57 | | 1.10772E+32 | | | 0.21 | | | < .001 | | | 0.0671 | | |
| null | 2 | 3038.23 | 192.92 | 7.77980E+41 | 0.00 | - | 0.0000 |  | null | | | 2 | | 3734.20 | | 185.34 | | 1.76583E+40 | | | 0.00 | | | - | | | 0.0000 | | |

*Note*. k = Number of Parameter; AICc = Akaike-Information Criterion; AICc = Difference of the AICc of the respective model compared to the AICc of the best fitting model. Akaike weight = Probability that the model is the best model; Evidence ratio = Ratio of the Akaike weight in comparison to the best fitting model. Indicates how much more likely the best fitting model is (with compared to this model); CFI = Comparative fit index; SRMR = R²adj = explained variance adjusted for the number of parameters.

*Model names. Models are sorted with decreasing complexity (*Schönbrodt, n.d.)*.* Full = Full Polynomial Model; SRRR = Shifted and Rotated Rising Ridge Model; SRSQD = Shifted and Rotated Squared Difference Model; SRR = Shifted Rising Ridge Model; SSQD = Shifted Squared Difference Model; RR = Rising Ridge Model; SQD = Basic Squared Difference Model; Additive = Additives Modell; IA = Interaction-Only-Model; Onlyx2 / Onlyy2 = model with squared predictors; Onlyx / Onlyy = Model with only one predictor; null = null model.

Table s12

*Regression- and Response Surface Parameter of the full polynomial models separately for men and women*

|  | Women | | | | | | | | |  | | Men | | | | | | | | | | | | | |
| --- | --- | --- | --- | --- | --- | --- | --- | --- | --- | --- | --- | --- | --- | --- | --- | --- | --- | --- | --- | --- | --- | --- | --- | --- | --- |
| Parameter | Estimator | *SE* | 95%-CI  lower bound | | 95%-CI  upper bound | | | *p* | |  | | Estimator | | *SE* | | 95%-CI  lower bound | | | 95%-CI  upper bound | | | *p* | | | |
|  | Depression | | | | | | | | | | | | | | | | | | | | | | | | |
| Frequency |  |  |  | |  | | |  | |  | |  | |  | |  | | |  | | |  | | | |
| *b0* | 15.81 | 0.39 | 15.06 |  | 16.57 |  | | < .001 | |  | | 14.63 | | 0.27 | | 14.10 |  | | 15.17 |  | | < .001 |
| *b1* | 2.32 | 0.36 | 1.59 |  | 2.99 |  | | < .001 | |  | | 2.5 | | 0.27 | | 1.96 |  | | 3.03 |  | | < .001 |
| *b2* | -0.05 | 0.38 | -0.82 |  | 0.72 |  | | .931 | |  | | -0.68 | | 0.30 | | -1.28 |  | | -0.09 |  | | .023 |
| *b3* | 0.34 | 0.21 | -0.07 |  | 0.77 |  | | .108 | |  | | 0.73 | | 0.19 | | 0.35 |  | | 1.09 |  | | < .001 |
| *b4* | -0.31 | 0.35 | -1.03 |  | 0.36 |  | | .345 | |  | | -0.71 | | 0.24 | | -1.21 |  | | -0.22 |  | | .004 |
| *b5* | -0.03 | 0.31 | -0.70 |  | 0.58 |  | | .932 | |  | | 0.15 | | 0.29 | | -0.41 |  | | 0.73 |  | | .601 |
| *a1* | 2.27 | 0.37 | 1.50 |  | 2.98 |  | | < .001 | |  | | 1.82 | | 0.29 | | 1.25 |  | | 2.38 |  | | < .001 |
| *a2* | 0.00 | 0.40 | -0.83 |  | 0.76 |  | | .965 | |  | | 0.17 | | 0.30 | | -0.43 |  | | 0.76 |  | | .568 |
| *a3* | 2.36 | 0.64 | 1.07 |  | 3.59 |  | | .001 | |  | | 3.18 | | 0.49 | | 2.21 |  | | 4.17 |  | | < .001 |
| *a4* | 0.63 | 0.62 | -0.61 |  | 1.88 |  | | .301 | |  | | 1.59 | | 0.44 | | 0.71 |  | | 2.48 |  | | < .001 |
| *a5* | 0.37 | 0.37 | -0.36 |  | 1.14 |  | | .311 | |  | | 0.58 | | 0.39 | | -0.20 |  | | 1.33 |  | | .148 |
| Discrepancy |  |  |  |  |  |  | |  | |  | |  | |  | |  |  | |  |  | |  |
| *b0* | 16.36 | 0.38 | 15.61 |  | 17.11 |  | | < .001 | |  | | 14.67 | | 0.29 | | 14.10 |  | | 15.24 |  | | < .001 |
| *b1* | 2.37 | 0.41 | 1.49 |  | 3.19 |  | | < .001 | |  | | 2.35 | | 0.33 | | 1.69 |  | | 3.03 |  | | < .001 |
| *b2* | -0.17 | 0.58 | -1.35 |  | 0.99 |  | | .779 | |  | | -0.62 | | 0.42 | | -1.47 |  | | 0.21 |  | | .140 |
| *b3* | -0.42 | 0.31 | -1.02 |  | 0.23 |  | | .197 | |  | | 0.14 | | 0.25 | | -0.35 |  | | 0.65 |  | | .572 |
| *b4* | -0.72 | 0.44 | -1.62 |  | 0.15 |  | | .109 | |  | | -0.84 | | 0.35 | | -1.57 |  | | -0.12 |  | | .020 |
| *b5* | 0.47 | 0.54 | -0.58 |  | 1.52 |  | | .385 | |  | | 0.63 | | 0.40 | | -0.17 |  | | 1.41 |  | | .114 |
| *a1* | 2.20 | 0.60 | 0.99 |  | 3.39 |  | | < .001 | |  | | 1.74 | | 0.36 | | 1.03 |  | | 2.45 |  | | < .001 |
| *a2* | -0.66 | 0.52 | -1.66 |  | 0.40 |  | | .224 | |  | | -0.07 | | 0.38 | | -0.81 |  | | 0.68 |  | | .833 |
| *a3* | 2.53 | 0.81 | 0.87 |  | 4.13 |  | | .005 | |  | | 2.97 | | 0.67 | | 1.65 |  | | 4.35 |  | | < .001 | |
| *a4* | 0.77 | 0.85 | -0.88 |  | 2.56 |  | | .378 | |  | | 1.60 | | 0.66 | | 0.29 |  | | 3.07 |  | | .018 | |
| *a5* | -0.89 | 0.68 | -2.23 |  | 0.46 |  | | .196 | |  | | -0.50 | | 0.52 | | -1.51 |  | | 0.53 |  | | .352 | |
| Affective Impact |  |  |  |  |  |  | |  | |  | |  | |  | |  |  | |  |  | |  | |
| *b0* | 16.15 | 0.38 | 15.39 |  | 16.90 |  | | < .001 | |  | | 15.60 | | 0.35 | | 14.92 |  | | 16.28 |  | | < .001 | |
| *b1* | 5.15 | 0.61 | 3.95 |  | 6.33 |  | | < .001 | |  | | 3.97 | | 0.61 | | 2.79 |  | | 5.23 |  | | < .001 | |
| *b2* | -0.71 | 0.67 | -2.02 |  | 0.67 |  | | .292 | |  | | -1.04 | | 0.78 | | -2.54 |  | | 0.58 |  | | .206 | |
| *b3* | -0.77 | 0.48 | -1.79 |  | 0.11 |  | | .084 | |  | | -2.22 | | 0.84 | | -3.85 |  | | -0.60 |  | | .008 | |
| *b4* | -0.29 | 1.24 | -3.12 |  | 1.89 |  | | .766 | |  | | -5.57 | | 1.49 | | -8.45 |  | | -2.50 |  | | .001 | |
| *b5* | -1.63 | 1.95 | -5.60 |  | 2.33 |  | | .384 | |  | | 0.72 | | 1.97 | | -3.07 |  | | 4.84 |  | | .696 | |
| *a1* | 4.43 | 0.93 | 2.58 |  | 6.23 |  | | < .001 | |  | | 2.94 | | 1.00 | | 1.03 |  | | 5.06 |  | | .002 | |
| *a2* | -2.69 | 2.66 | -8.66 |  | 2.23 |  | | .272 | |  | | -7.06 | | 2.67 | | -12.12 |  | | -1.53 |  | | .014 | |
| *a3* | 5.86 | 0.88 | 4.10 |  | 7.53 |  | | < .001 | |  | | 5.01 | | 0.99 | | 3.05 |  | | 6.95 |  | | < .001 | |
| *a4* | -2.10 | 2.03 | -6.06 |  | 2.11 |  | | .309 | |  | | 4.07 | | 2.46 | | -0.71 |  | | 9.01 |  | | .101 | |
| *a5* | 0.86 | 2.02 | -3.30 |  | 4.89 |  | | .654 | |  | | -2.94 | | 2.19 | | -7.46 |  | | 1.22 |  | | .165 | |
|  | Psychological Well-Being | | | | | | | | | | | | | | | | | | | | | | | | |
| *Frequency* |  |  |  | |  | | |  | |  | |  | |  | |  | | |  | | |  | | | |
| *b0* | 91.55 | 0.98 | 89.63 |  | 93.48 |  | | < .001 | |  | | 87.05 | | 0.86 | | 85.36 |  | | 88.73 |  | | < .001 | | |
| *b1* | -6.69 | 0.99 | -8.67 |  | -4.67 |  | | < .001 | |  | | -8.59 | | 0.87 | | -10.37 |  | | -6.94 |  | | < .001 | | |
| *b2* | 2.57 | 1.04 | 0.44 |  | 4.61 |  | | .021 | |  | | 4.03 | | 0.86 | | 2.35 |  | | 5.75 |  | | < .001 | | |
| *b3* | -0.05 | 0.56 | -1.18 |  | 1.08 |  | | .938 | |  | | 1.54 | | 0.69 | | 0.20 |  | | 2.94 |  | | .024 | | |
| *b4* | 1.17 | 0.84 | -0.55 |  | 2.90 |  | | .180 | |  | | 0.04 | | 0.84 | | -1.78 |  | | 1.60 |  | | .963 | | |
| *b5* | -1.98 | 0.76 | -3.56 |  | -0.45 |  | | .013 | |  | | -0.94 | | 0.89 | | -2.66 |  | | 0.87 |  | | .309 | | |
| *a1* | -4.12 | 1.03 | -6.19 |  | -2.05 |  | | < .001 | |  | | -4.56 | | 0.87 | | -6.28 |  | | -2.81 |  | | < .001 | | |
| *a2* | -0.86 | 1.08 | -3.08 |  | 1.31 |  | | .435 | |  | | 0.63 | | 0.90 | | -1.12 |  | | 2.46 |  | | .484 | | |
| *a3* | -9.26 | 1.75 | -12.76 |  | -5.70 |  | | < .001 | |  | | -12.62 | | 1.50 | | -15.73 |  | | -9.79 |  | | < .001 | | |
| *a4* | -3.19 | 1.36 | -5.96 |  | -0.45 |  | | .025 | |  | | 0.56 | | 1.58 | | -2.36 |  | | 4.07 |  | | .729 | | |
| *a5* | 1.93 | 0.99 | -0.06 |  | 3.97 |  | | .057 | |  | | 2.48 | | 1.26 | | 0.02 |  | | 5.01 |  | | .048 | | |
|  |  |  |  |  |  |  | |  | |  | |  | |  | |  |  | |  |  | |  | | |
| Discrepancy |  |  |  |  |  |  | |  | |  | |  | |  | |  |  | |  |  | |  | | |
| *b0* | 91.06 | 1.02 | 89.06 |  | 93.06 |  | | < .001 | |  | | 88.37 | | 0.87 | | 86.66 |  | | 90.08 |  | | < .001 | | |
| *b1* | -7.06 | 1.21 | -9.69 |  | -4.65 |  | | < .001 | |  | | -8.56 | | 1.05 | | -10.85 |  | | -6.61 |  | | < .001 | | |
| *b2* | 0.28 | 1.43 | -2.51 |  | 3.17 |  | | .824 | |  | | 3.97 | | 1.19 | | 1.66 |  | | 6.47 |  | | .001 | | |
| *b3* | 1.33 | 0.88 | -0.42 |  | 3.12 |  | | .141 | |  | | 1.43 | | 0.78 | | 0.02 |  | | 3.19 |  | | .047 | | |
| *b4* | 1.89 | 1.21 | -0.57 |  | 4.26 |  | | .130 | |  | | 0.78 | | 1.10 | | -1.87 |  | | 2.68 |  | | .551 | | |
| *b5* | -4.56 | 1.19 | -6.96 |  | -2.16 |  | | < .001 | |  | | -1.38 | | 1.14 | | -3.59 |  | | 1.01 |  | | .260 | | |
| *a1* | -6.78 | 1.46 | -9.64 |  | -3.86 |  | | < .001 | |  | | -4.60 | | 0.96 | | -6.59 |  | | -2.69 |  | | < .001 | | |
| *a2* | -1.34 | 1.39 | -4.23 |  | 1.40 |  | | .338 | |  | | 0.84 | | 1.03 | | -1.26 |  | | 2.86 |  | | .435 | | |
| *a3* | -7.34 | 2.22 | -11.99 |  | -2.96 |  | | .001 | |  | | -12.53 | | 2.04 | | -16.92 |  | | -8.82 |  | | < .001 | | |
| *a4* | -5.11 | 2.15 | -9.39 |  | -0.80 |  | | .021 | |  | | -0.73 | | 2.11 | | -4.34 |  | | 4.59 |  | | .796 | | |
| *a5* | 5.89 | 1.60 | 2.72 |  | 9.13 |  | | < .001 | |  | | 2.81 | | 1.50 | | -0.11 |  | | 5.79 |  | | .060 | | |
| Affective Impact |  |  |  |  |  |  | |  | |  | |  | |  | |  |  | |  |  | |  | | |
| *b0* | 89.91 | 1.12 | 87.73 |  | 92.10 |  | | < .001 | |  | | 87.78 | | 1.03 | | 85.76 |  | | 89.79 |  | | < .001 | | |
| *b1* | -8.72 | 1.97 | -12.61 |  | -4.76 |  | | < .001 | |  | | -11.29 | | 1.95 | | -15.10 |  | | -7.33 |  | | < .001 | | |
| *b2* | 3.34 | 2.19 | -1.18 |  | 7.69 |  | | .136 | |  | | 12.45 | | 2.44 | | 7.72 |  | | 17.34 |  | | < .001 | | |
| *b3* | 2.65 | 1.43 | -0.05 |  | 5.64 |  | | .054 | |  | | 6.73 | | 2.20 | | 2.55 |  | | 11.31 |  | | .003 | | |
| *b4* | 9.64 | 3.71 | 2.83 |  | 18.06 |  | | .005 | |  | | 11.79 | | 4.61 | | 2.76 |  | | 21.06 |  | | .011 | | |
| *b5* | -4.41 | 5.99 | -16.37 |  | 8.07 |  | | .494 | |  | | -5.89 | | 6.20 | | -18.41 |  | | 6.57 |  | | .359 | | |
| *a1* | -5.38 | 3.10 | -11.55 |  | 0.98 |  | | .094 | |  | | 1.17 | | 3.48 | | -5.74 |  | 8.09 | |  | | .728 | | |
| *a2* | 7.88 | 7.94 | -6.97 |  | 25.65 |  | | .296 | |  | | 12.63 | | 9.19 | | -5.46 |  | 31.32 | |  | | .173 | | |
| *a3* | -12.06 | 2.78 | -17.44 |  | -6.44 |  | | < .001 | |  | | -23.74 | | 2.73 | | -29.28 |  | -18.59 | |  | | < .001 | | |
| *a4* | -11.40 | 6.33 | -24.21 |  | 1.02 |  | | .071 | |  | | -10.95 | | 6.64 | | -23.81 |  | 2.70 | |  | | .108 | | |
| *a5* | 7.07 | 6.17 | -5.48 |  | 19.57 |  | | .272 | |  | | 12.61 | | 6.59 | | -0.33 |  | 26.08 | |  | | .058 | | |
|  | Self-Esteem | | | | | | | | | | | | | | | | | | | | | | | | |
| *Frequency* |  |  |  | |  | | |  | |  | |  | |  | |  | | |  | | |  | | | |
| *b0* | 29.77 | 0.38 | 29.03 |  | 30.50 |  | < .001 | |  | | 28.84 | | 0.31 | | 28.23 | |  | 29.44 | |  | < .001 | | | |
| *b1* | -3.42 | 0.37 | -4.14 |  | -2.64 |  | < .001 | |  | | -3.55 | | 0.29 | | -4.12 | |  | -2.97 | |  | < .001 | | | |
| *b2* | 1.22 | 0.40 | 0.42 |  | 2.01 |  | .004 | |  | | 2.32 | | 0.31 | | 1.71 | |  | 2.93 | |  | < .001 | | | |
| *b3* | -0.08 | 0.22 | -0.54 |  | 0.34 |  | .694 | |  | | 0.46 | | 0.23 | | -0.02 | |  | 0.92 | |  | .061 | | | |
| *b4* | 0.45 | 0.33 | -0.18 |  | 1.14 |  | .160 | |  | | 0.52 | | 0.26 | | -0.01 | |  | 1.05 | |  | .051 | | | |
| *b5* | -0.89 | 0.31 | -1.50 |  | -0.27 |  | .008 | |  | | -0.61 | | 0.35 | | -1.29 | |  | 0.08 | |  | .083 | | | |
| *a1* | -2.20 | 0.39 | -2.96 |  | -1.40 |  | < .001 | |  | | -1.22 | | 0.31 | | -1.83 | |  | -0.61 | |  | < .001 | | | |
| *a2* | -0.52 | 0.40 | -1.31 |  | 0.30 |  | .210 | |  | | 0.37 | | 0.33 | | -0.30 | |  | 1.04 | |  | .274 | | | |
| *a3* | -4.64 | 0.67 | -5.96 |  | -3.26 |  | < .001 | |  | | -5.87 | | 0.52 | | -6.88 | |  | -4.83 | |  | < .001 | | | |
| *a4* | -1.43 | 0.59 | -2.62 |  | -0.30 |  | .014 | |  | | -0.67 | | 0.51 | | -1.71 | |  | 0.34 | |  | .186 | | | |
| *a5* | 0.81 | 0.38 | 0.03 |  | 1.56 |  | .041 | |  | | 1.07 | | 0.48 | | 0.09 | |  | 2.02 | |  | .031 | | | |
| Discrepancy |  |  |  |  |  |  |  | |  | |  | |  | |  | |  |  | |  |  | | | |
| *b0* | 29.24 | 0.41 | 28.44 |  | 30.04 |  | < .001 | |  | | 29.15 | | 0.32 | | 28.52 | |  | 29.78 | |  | < .001 | | | |
| *b1* | -3.52 | 0.47 | -4.47 |  | -2.60 |  | < .001 | |  | | -3.52 | | 0.34 | | -4.23 | |  | -2.86 | |  | < .001 | | | |
| *b2* | 0.88 | 0.56 | -0.23 |  | 2.04 |  | .126 | |  | | 2.52 | | 0.38 | | 1.77 | |  | 3.31 | |  | < .001 | | | |
| *b3* | 0.66 | 0.35 | -0.06 |  | 1.37 |  | .070 | |  | | 0.65 | | 0.27 | | 0.10 | |  | 1.21 | |  | .022 | | | |
| *b4* | 0.92 | 0.55 | -0.18 |  | 1.99 |  | .103 | |  | | 0.58 | | 0.38 | | -0.22 | |  | 1.33 | |  | .150 | | | |
| *b5* | -1.49 | 0.50 | -2.49 |  | -0.49 |  | .003 | |  | | -0.54 | | 0.38 | | -1.31 | |  | 0.24 | |  | .162 | | | | |
| *a1* | -2.63 | 0.54 | -3.72 |  | -1.58 |  | < .001 | |  | | -1.00 | | 0.34 | | -1.68 | |  | -0.33 | |  | .003 | | | | |
| *a2* | 0.08 | 0.49 | -0.94 |  | 1.04 |  | .897 | |  | | 0.69 | | 0.41 | | -0.12 | |  | 1.48 | |  | .088 | | | | |
| *a3* | -4.40 | 0.88 | -6.23 |  | -2.65 |  | < .001 | |  | | -6.04 | | 0.64 | | -7.38 | |  | -4.83 | |  | < .001 | | | | |
| *a4* | -1.75 | 1.07 | -3.86 |  | 0.41 |  | .104 | |  | | -0.47 | | 0.70 | | -1.87 | |  | 1.07 | |  | .515 | | | | |
| *a5* | 2.15 | 0.59 | 0.95 |  | 3.32 |  | .001 | |  | | 1.19 | | 0.51 | | 0.19 | |  | 2.20 | |  | .020 | | | | |
| Affective Impact |  |  |  |  |  |  |  | |  | |  | |  | |  | |  |  | |  |  | | | | |
| *b0* | 29.17 | 0.40 | 28.39 |  | 29.95 |  | < .001 | |  | | 28.74 | | 0.40 | | 27.96 | |  | 29.52 | |  | < .001 | | | | |
| *b1* | -5.80 | 0.68 | -7.11 |  | -4.43 |  | < .001 | |  | | -5.30 | | 0.70 | | -6.73 | |  | -3.94 | |  | < .001 | | | | |
| *b2* | 0.91 | 0.79 | -0.66 |  | 2.48 |  | .250 | |  | | 4.76 | | 0.82 | | 3.08 | |  | 6.37 | |  | < .001 | | | | |
| *b3* | 1.18 | 0.49 | 0.28 |  | 2.20 |  | .011 | |  | | 2.08 | | 0.87 | | 0.40 | |  | 3.84 | |  | .015 | | | | |
| *b4* | 1.90 | 1.34 | -0.42 |  | 5.01 |  | .120 | |  | | 4.66 | | 1.71 | | 1.11 | |  | 7.98 | |  | .009 | | | | |
| *b5* | -3.01 | 2.16 | -7.21 |  | 1.54 |  | .192 | |  | | -1.70 | | 2.12 | | -6.01 | |  | 2.49 | |  | .411 | | | | |
| *a1* | -4.89 | 1.11 | -7.03 |  | -2.64 |  | < .001 | |  | | -0.55 | | 1.18 | | -2.99 | |  | 1.71 | |  | .649 | | | | |
| *a2* | 0.06 | 2.96 | -5.34 |  | 6.75 |  | .964 | |  | | 5.04 | | 3.26 | | -1.59 | |  | 11.54 | |  | .136 | | | | |
| *a3* | -6.71 | 0.97 | -8.60 |  | -4.77 |  | < .001 | |  | | -10.06 | | 0.98 | | -12.03 | |  | -8.15 | |  | < .001 | | | | |
| *a4* | -3.74 | 2.10 | -7.92 |  | 0.45 |  | .081 | |  | | -4.28 | | 2.46 | | -9.07 | |  | 0.63 | |  | .088 | | | | |
| *a5* | 4.19 | 2.25 | -0.47 |  | 8.56 |  | .078 | |  | | 3.77 | | 2.26 | | -0.67 | |  | 8.37 | |  | .094 | | | | |

*Note.* *SE* = Standard error; CI = confidence interval; *b*0 = Intercept; *b*1 = aversive comparison component; *b*2 = appetitive comparison component; *b*3 = squared aversive comparison component; *b*4 = interaction term aversive and appetitive aversive comparison component; *b*5 = squared appetitive aversive comparison component. CIs and *p*-values are based on a bootstrap procedure with 10.000 iterations expect for the Intercept

**Figure s1**

*Response Surface Plots for aversive and appetitive comparisons as predictor variables and depressive symptoms as outcome variable.*

| 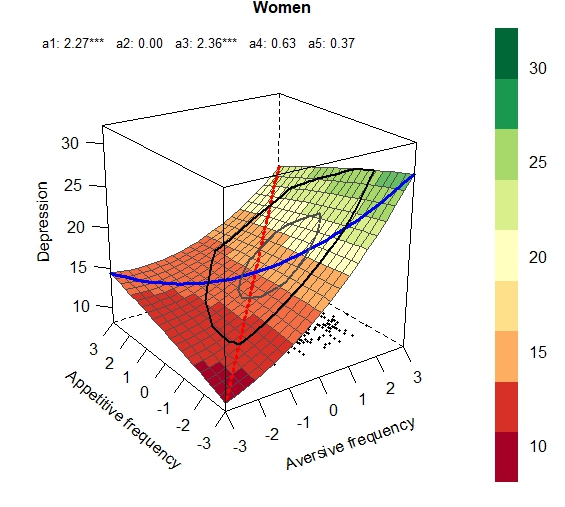 | 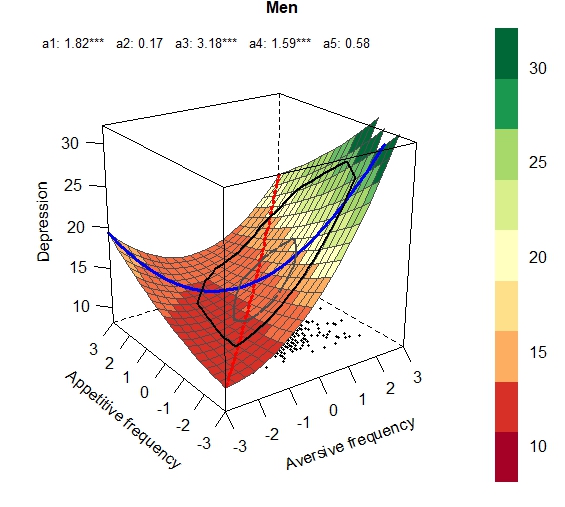 |
| --- | --- |
| 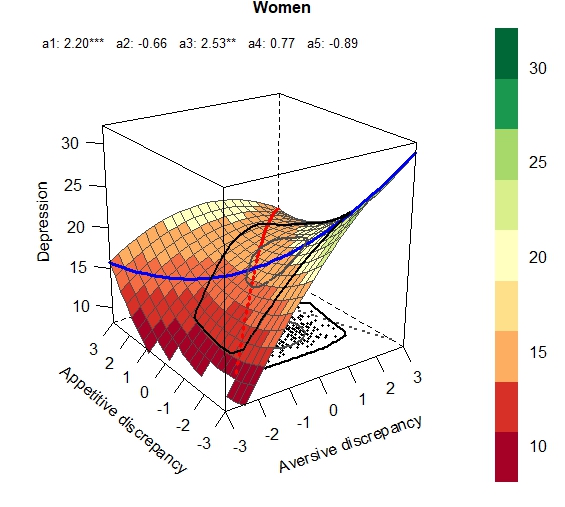 | 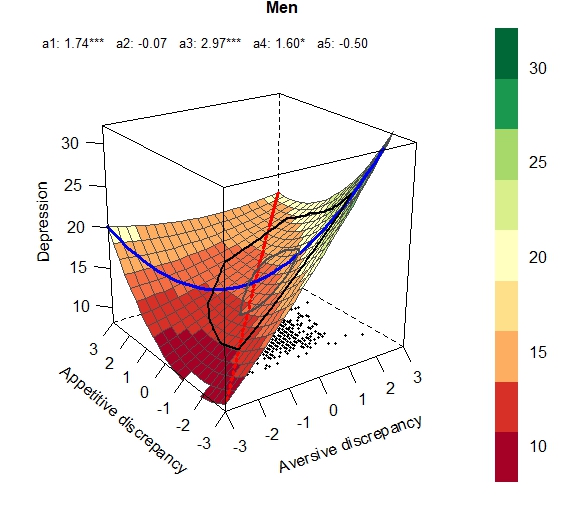 |
| 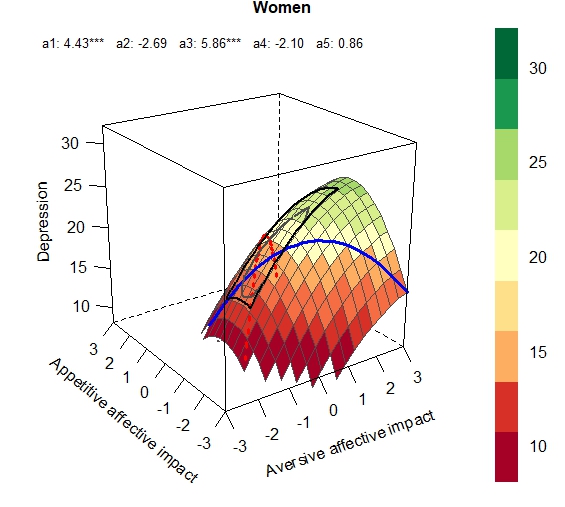 | 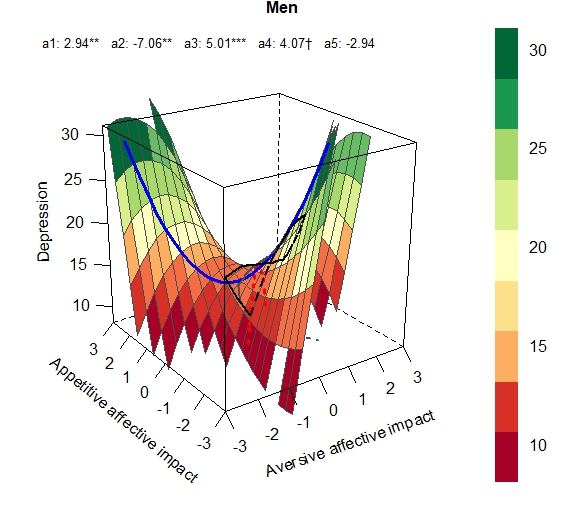 |
| **Figure s2**  *Response Surface Plots for aversive and appetitive comparisons as predictor variables and psychological well-being as outcome variable.* | |
| 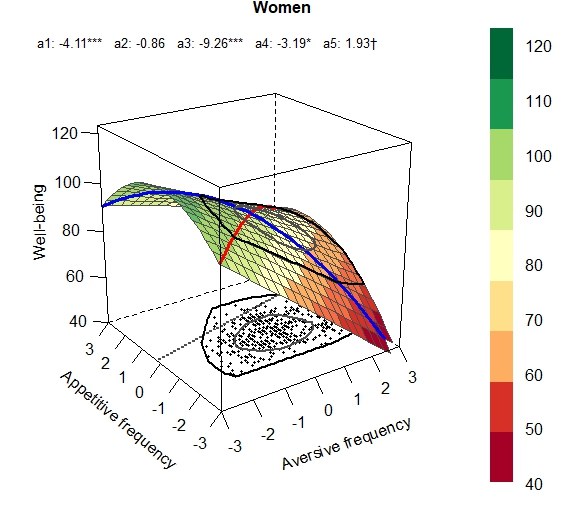 | 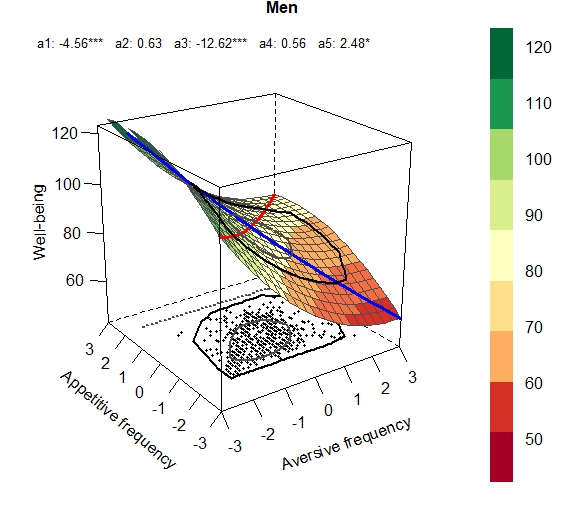 |
| 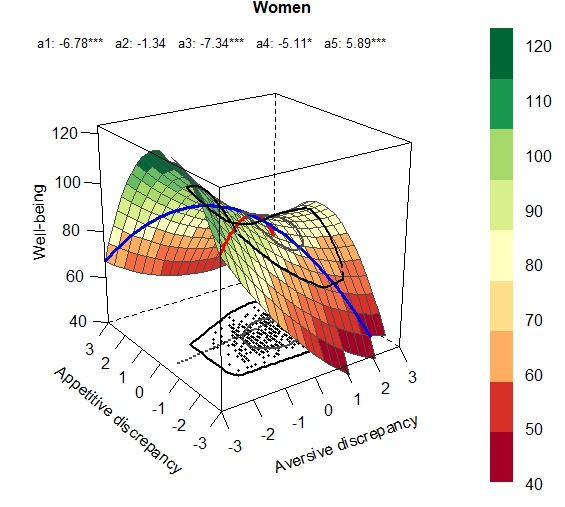 | 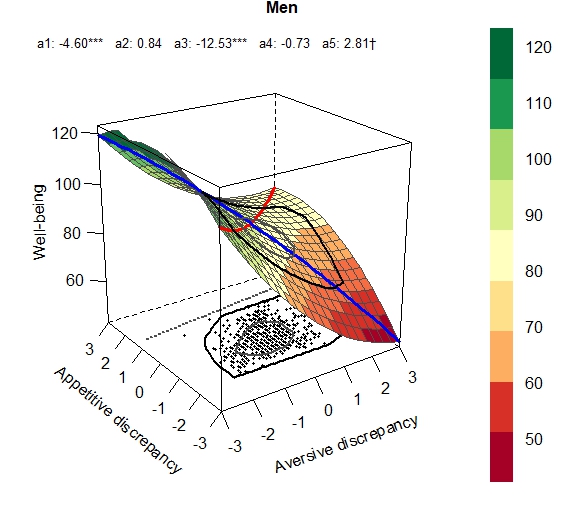 |
| 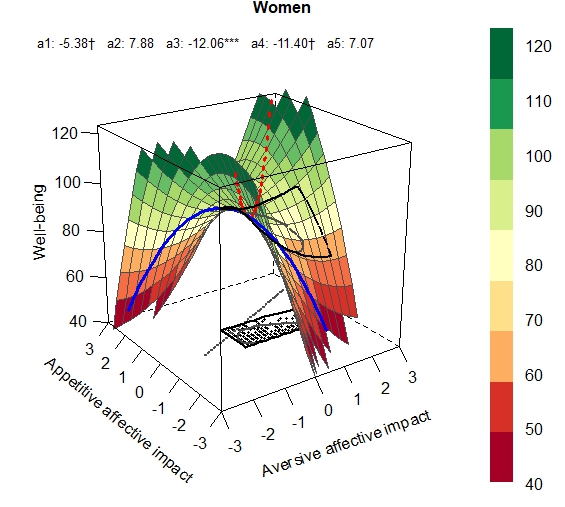 | 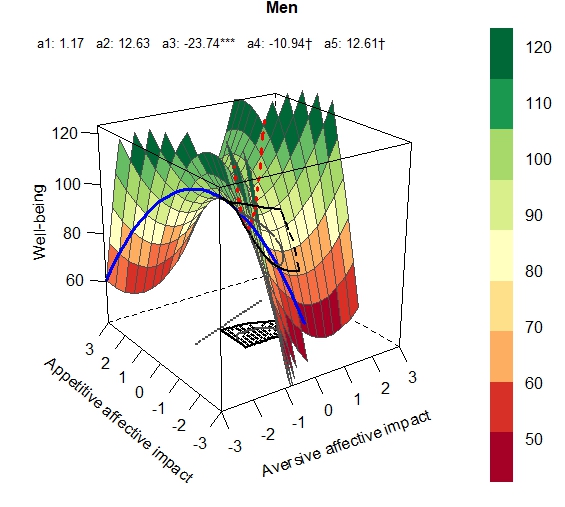 |
| **Figure s3**  *Response Surface Plots for aversive and appetitive comparisons as predictor variables and self-esteem as outcome variable.* | |
| 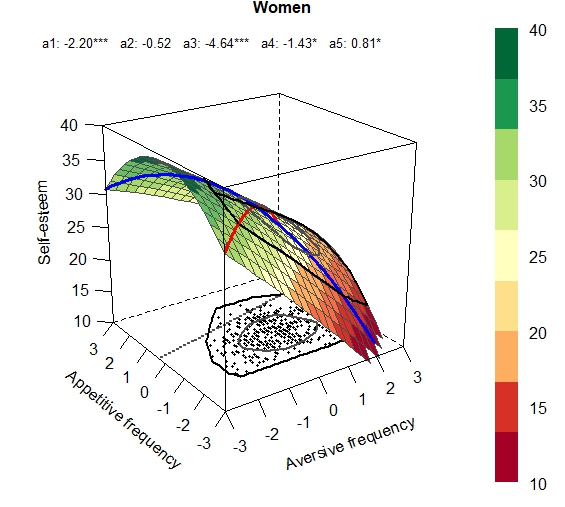 | 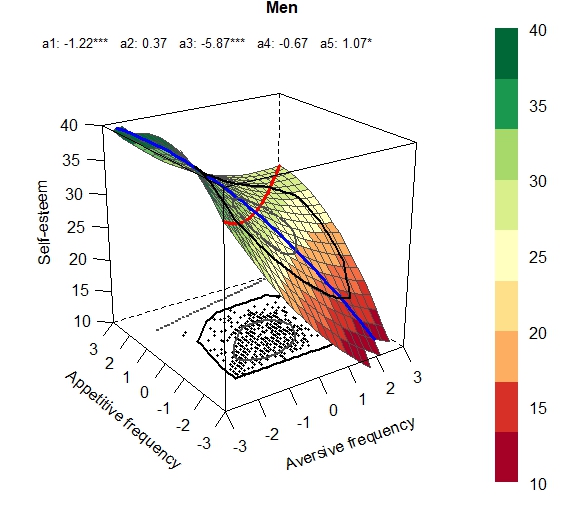 |
| 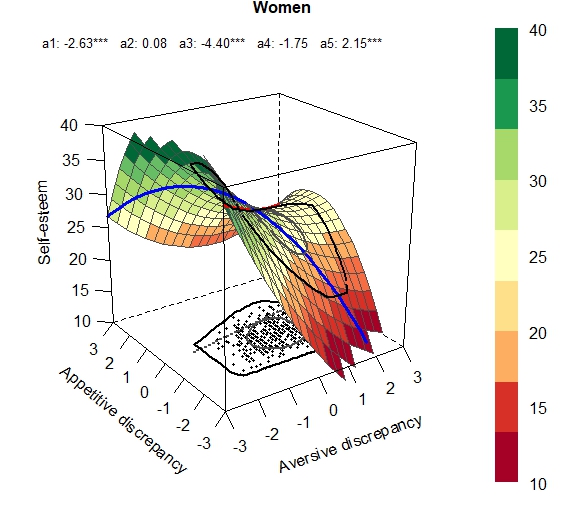 | 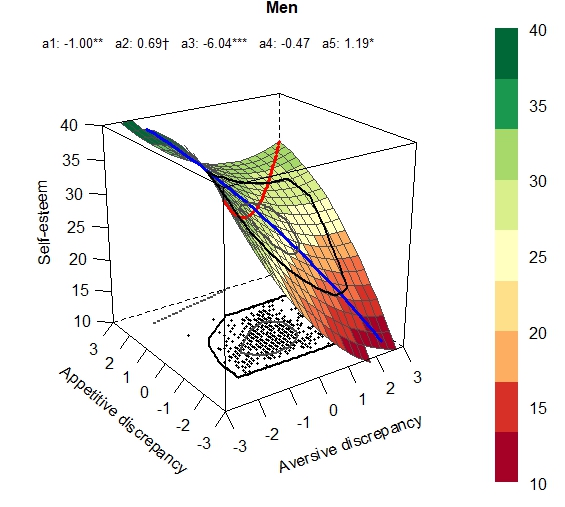 |
| 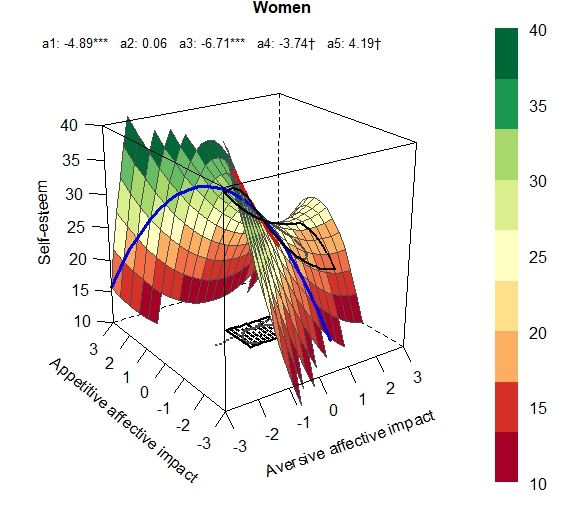 | 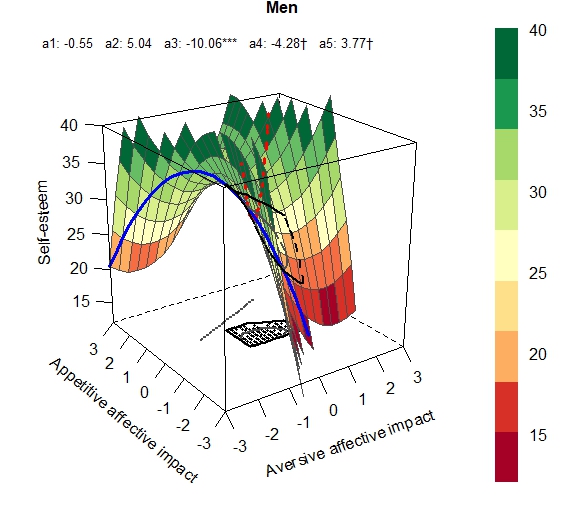 |
